# Supplementary material for: Comprehensive Analysis of Differentially Expressed circRNAs Reveals a Colorectal Cancer-Related ceRNA Network
Source: Comput Math Methods Med. 2020 Sep 1;2020:7159340. doi: 10.1155/2020/7159340 (PMC7481959; doi:10.1155/2020/7159340)
Supplement: Supplementary Materials — Supplementary table 1: the detailed information about circRNA-miRNA-mRNA network. [file 7159340.f1.xlsx]

## Sheet: supplementary table 1
Node 1	Node 2	regulation
hsa_circ_0024168	hsa-miR-24-3p	1
hsa_circ_0084663	hsa-miR-24-3p	1
hsa_circ_0079179	hsa-miR-24-3p	1
hsa_circ_0001875	hsa-miR-24-3p	1
hsa_circ_0001821	hsa-miR-24-3p	1
hsa_circ_0007714	hsa-miR-24-3p	1
hsa_circ_0006296	hsa-miR-24-3p	1
hsa_circ_0004983	hsa-miR-24-3p	1
hsa_circ_0002902	hsa-miR-24-3p	1
hsa_circ_0005620	hsa-miR-24-3p	1
hsa_circ_0030694	hsa-miR-24-3p	1
hsa_circ_0006932	hsa-miR-24-3p	1
hsa_circ_0069443	hsa-miR-29a-3p	1
hsa_circ_0006567	hsa-miR-29a-3p	1
hsa_circ_0001481	hsa-miR-29a-3p	1
hsa_circ_0001023	hsa-miR-29a-3p	1
hsa_circ_0077101	hsa-miR-29b-3p	1
hsa_circ_0000356	hsa-miR-29b-3p	1
hsa_circ_0005111	hsa-miR-29b-3p	1
hsa_circ_0006932	hsa-miR-29b-3p	1
hsa_circ_0015136	hsa-miR-29b-3p	1
hsa_circ_0001245	hsa-miR-29b-3p	1
hsa_circ_0003146	hsa-miR-29a-3p	1
hsa_circ_0015136	hsa-miR-29a-3p	1
hsa_circ_0068651	hsa-miR-29a-3p	1
hsa_circ_0001364	hsa-miR-29a-3p	1
hsa_circ_0001717	hsa-miR-29b-3p	1
hsa_circ_0006567	hsa-miR-29b-3p	1
hsa_circ_0001023	hsa-miR-29b-3p	1
hsa_circ_0001481	hsa-miR-29b-3p	1
hsa_circ_0069443	hsa-miR-29b-3p	1
hsa_circ_0001364	hsa-miR-29b-3p	1
hsa_circ_0068651	hsa-miR-29b-3p	1
hsa_circ_0001245	hsa-miR-29a-3p	1
hsa_circ_0000374	hsa-miR-29a-3p	1
hsa_circ_0005111	hsa-miR-29a-3p	1
hsa_circ_0077101	hsa-miR-29a-3p	1
hsa_circ_0001717	hsa-miR-29a-3p	1
hsa_circ_0000374	hsa-miR-29b-3p	1
hsa_circ_0003146	hsa-miR-29b-3p	1
hsa_circ_0006932	hsa-miR-29a-3p	1
hsa_circ_0000356	hsa-miR-29a-3p	1
hsa_circ_0059484	hsa-miR-23a-3p	1
hsa_circ_0001784	hsa-miR-16-5p	1
hsa_circ_0001875	hsa-miR-16-5p	1
hsa_circ_0079380	hsa-miR-16-5p	1
hsa_circ_0007413	hsa-miR-16-5p	1
hsa_circ_0002744	hsa-miR-16-5p	1
hsa_circ_0003458	hsa-miR-15a-5p	1
hsa_circ_0075504	hsa-miR-15a-5p	1
hsa_circ_0060521	hsa-miR-23a-3p	1
hsa_circ_0059957	hsa-miR-23a-3p	1
hsa_circ_0036799	hsa-miR-15a-5p	1
hsa_circ_0007915	hsa-miR-16-5p	1
hsa_circ_0003730	hsa-miR-23a-3p	1
hsa_circ_0001875	hsa-miR-15a-5p	1
hsa_circ_0002744	hsa-miR-15a-5p	1
hsa_circ_0004047	hsa-miR-23a-3p	1
hsa_circ_0064340	hsa-miR-23a-3p	1
hsa_circ_0013092	hsa-miR-23a-3p	1
hsa_circ_0001364	hsa-miR-23a-3p	1
hsa_circ_0007915	hsa-miR-15a-5p	1
hsa_circ_0009144	hsa-miR-15a-5p	1
hsa_circ_0000799	hsa-miR-15a-5p	1
hsa_circ_0003423	hsa-miR-16-5p	1
hsa_circ_0007413	hsa-miR-15a-5p	1
hsa_circ_0079380	hsa-miR-15a-5p	1
hsa_circ_0008639	hsa-miR-15a-5p	1
hsa_circ_0001295	hsa-miR-23a-3p	1
hsa_circ_0001103	hsa-miR-23a-3p	1
hsa_circ_0066279	hsa-miR-15a-5p	1
hsa_circ_0007947	hsa-miR-15a-5p	1
hsa_circ_0038074	hsa-miR-15a-5p	1
hsa_circ_0005311	hsa-miR-23a-3p	1
hsa_circ_0005260	hsa-miR-23a-3p	1
hsa_circ_0024168	hsa-miR-23a-3p	1
hsa_circ_0003458	hsa-miR-23a-3p	1
hsa_circ_0075504	hsa-miR-23a-3p	1
hsa_circ_0008639	hsa-miR-16-5p	1
hsa_circ_0075504	hsa-miR-16-5p	1
hsa_circ_0002353	hsa-miR-16-5p	1
hsa_circ_0003949	hsa-miR-23a-3p	1
hsa_circ_0002744	hsa-miR-23a-3p	1
hsa_circ_0040370	hsa-miR-15a-5p	1
hsa_circ_0005620	hsa-miR-15a-5p	1
hsa_circ_0001784	hsa-miR-15a-5p	1
hsa_circ_0004841	hsa-miR-15a-5p	1
hsa_circ_0004354	hsa-miR-15a-5p	1
hsa_circ_0004354	hsa-miR-16-5p	1
hsa_circ_0003458	hsa-miR-16-5p	1
hsa_circ_0007523	hsa-miR-23a-3p	1
hsa_circ_0046999	hsa-miR-23a-3p	1
hsa_circ_0009144	hsa-miR-16-5p	1
hsa_circ_0040370	hsa-miR-16-5p	1
hsa_circ_0001295	hsa-miR-16-5p	1
hsa_circ_0066279	hsa-miR-16-5p	1
hsa_circ_0007947	hsa-miR-16-5p	1
hsa_circ_0008132	hsa-miR-15a-5p	1
hsa_circ_0001295	hsa-miR-15a-5p	1
hsa_circ_0002353	hsa-miR-15a-5p	1
hsa_circ_0036799	hsa-miR-16-5p	1
hsa_circ_0004194	hsa-miR-15a-5p	1
hsa_circ_0006932	hsa-miR-18a-5p	1
hsa_circ_0005620	hsa-miR-18a-5p	1
hsa_circ_0000566	hsa-miR-18a-5p	1
hsa_circ_0024951	hsa-miR-23a-3p	1
hsa_circ_0017521	hsa-miR-23a-3p	1
hsa_circ_0006932	hsa-miR-23a-3p	1
hsa_circ_0008132	hsa-miR-16-5p	1
hsa_circ_0005620	hsa-miR-16-5p	1
hsa_circ_0007096	hsa-miR-18a-5p	1
hsa_circ_0081534	hsa-miR-18a-5p	1
hsa_circ_0004194	hsa-miR-16-5p	1
hsa_circ_0003423	hsa-miR-15a-5p	1
hsa_circ_0084052	hsa-miR-18a-5p	1
hsa_circ_0001481	hsa-miR-18a-5p	1
hsa_circ_0061744	hsa-miR-18a-5p	1
hsa_circ_0038074	hsa-miR-16-5p	1
hsa_circ_0000799	hsa-miR-16-5p	1
hsa_circ_0004841	hsa-miR-16-5p	1
hsa_circ_0023938	hsa-miR-107	1
hsa_circ_0005620	hsa-miR-107	1
hsa_circ_0005844	hsa-miR-107	1
hsa_circ_0002001	hsa-miR-31-5p	1
hsa_circ_0030377	hsa-miR-107	1
hsa_circ_0059473	hsa-miR-31-5p	1
hsa_circ_0057608	hsa-miR-31-5p	1
hsa_circ_0008694	hsa-miR-31-5p	1
hsa_circ_0000373	hsa-miR-107	1
hsa_circ_0036799	hsa-miR-107	1
hsa_circ_0001495	hsa-miR-107	1
hsa_circ_0008132	hsa-miR-107	1
hsa_circ_0070935	hsa-miR-31-5p	1
hsa_circ_0008038	hsa-miR-31-5p	1
hsa_circ_0007413	hsa-miR-107	1
hsa_circ_0073836	hsa-miR-31-5p	1
hsa_circ_0004191	hsa-miR-31-5p	1
hsa_circ_0009144	hsa-miR-107	1
hsa_circ_0002744	hsa-miR-107	1
hsa_circ_0000739	hsa-miR-107	1
hsa_circ_0023644	hsa-miR-31-5p	1
hsa_circ_0001875	hsa-miR-31-5p	1
hsa_circ_0008694	hsa-miR-107	1
hsa_circ_0007523	hsa-miR-31-5p	1
hsa_circ_0035197	hsa-miR-31-5p	1
hsa_circ_0000563	hsa-miR-31-5p	1
hsa_circ_0004841	hsa-miR-31-5p	1
hsa_circ_0004194	hsa-miR-107	1
hsa_circ_0003458	hsa-miR-107	1
hsa_circ_0008038	hsa-miR-107	1
hsa_circ_0001784	hsa-miR-107	1
hsa_circ_0007523	hsa-miR-103a-3p	1
hsa_circ_0038074	hsa-miR-103a-3p	1
hsa_circ_0000739	hsa-miR-103a-3p	1
hsa_circ_0004354	hsa-miR-103a-3p	1
hsa_circ_0036799	hsa-miR-103a-3p	1
hsa_circ_0009144	hsa-miR-103a-3p	1
hsa_circ_0003458	hsa-miR-103a-3p	1
hsa_circ_0007413	hsa-miR-103a-3p	1
hsa_circ_0002744	hsa-miR-103a-3p	1
hsa_circ_0005620	hsa-miR-103a-3p	1
hsa_circ_0003423	hsa-miR-103a-3p	1
hsa_circ_0008038	hsa-miR-103a-3p	1
hsa_circ_0001784	hsa-miR-103a-3p	1
hsa_circ_0023938	hsa-miR-103a-3p	1
hsa_circ_0008132	hsa-miR-103a-3p	1
hsa_circ_0001495	hsa-miR-103a-3p	1
hsa_circ_0005844	hsa-miR-103a-3p	1
hsa_circ_0000373	hsa-miR-103a-3p	1
hsa_circ_0030377	hsa-miR-103a-3p	1
hsa_circ_0008694	hsa-miR-103a-3p	1
hsa_circ_0004194	hsa-miR-103a-3p	1
hsa_circ_0000563	hsa-miR-33a-5p	1
hsa_circ_0025534	hsa-miR-33a-5p	1
hsa_circ_0007413	hsa-miR-33a-5p	1
hsa_circ_0001103	hsa-miR-33a-5p	1
hsa_circ_0081820	hsa-miR-33a-5p	1
hsa_circ_0004549	hsa-miR-33a-5p	1
hsa_circ_0008038	hsa-miR-33a-5p	1
hsa_circ_0004841	hsa-miR-33a-5p	1
hsa_circ_0001310	hsa-miR-33a-5p	1
hsa_circ_0059484	hsa-miR-33a-5p	1
hsa_circ_0030694	hsa-miR-30a-3p	1
hsa_circ_0001650	hsa-miR-30a-3p	1
hsa_circ_0008038	hsa-miR-30a-3p	1
hsa_circ_0018996	hsa-miR-30a-3p	1
hsa_circ_0079703	hsa-miR-30a-3p	1
hsa_circ_0025909	hsa-miR-30a-3p	1
hsa_circ_0032821	hsa-miR-30a-3p	1
hsa_circ_0007523	hsa-miR-30a-3p	1
hsa_circ_0037806	hsa-miR-30a-3p	1
hsa_circ_0000566	hsa-miR-30a-3p	1
hsa_circ_0025909	hsa-miR-30a-5p	1
hsa_circ_0006559	hsa-miR-30a-5p	1
hsa_circ_0057090	hsa-miR-30a-5p	1
hsa_circ_0000131	hsa-miR-30a-5p	1
hsa_circ_0001821	hsa-miR-30a-5p	1
hsa_circ_0023863	hsa-miR-30a-5p	1
hsa_circ_0004191	hsa-miR-30a-3p	1
hsa_circ_0057608	hsa-miR-30a-3p	1
hsa_circ_0068651	hsa-miR-30a-3p	1
hsa_circ_0081820	hsa-miR-30a-3p	1
hsa_circ_0000692	hsa-miR-30a-5p	1
hsa_circ_0007523	hsa-miR-30a-5p	1
hsa_circ_0004466	hsa-miR-20a-5p	1
hsa_circ_0004191	hsa-miR-20a-5p	1
hsa_circ_0074719	hsa-miR-20a-5p	1
hsa_circ_0004720	hsa-miR-93-5p	1
hsa_circ_0007523	hsa-miR-93-5p	1
hsa_circ_0057090	hsa-miR-26a-5p	1
hsa_circ_0006867	hsa-miR-26a-5p	1
hsa_circ_0001495	hsa-miR-93-5p	1
hsa_circ_0003730	hsa-let-7d-5p	1
hsa_circ_0000563	hsa-miR-19b-3p	1
hsa_circ_0004405	hsa-miR-93-5p	1
hsa_circ_0074719	hsa-miR-93-5p	1
hsa_circ_0046999	hsa-miR-19b-3p	1
hsa_circ_0007523	hsa-miR-19b-3p	1
hsa_circ_0066776	hsa-miR-27a-3p	1
hsa_circ_0007523	hsa-miR-26b-5p	1
hsa_circ_0003423	hsa-miR-27a-3p	1
hsa_circ_0024271	hsa-let-7d-5p	1
hsa_circ_0005367	hsa-let-7d-5p	1
hsa_circ_0004772	hsa-let-7d-5p	1
hsa_circ_0020340	hsa-miR-26b-5p	1
hsa_circ_0030694	hsa-miR-19b-3p	1
hsa_circ_0008038	hsa-miR-19b-3p	1
hsa_circ_0004191	hsa-miR-93-5p	1
hsa_circ_0003304	hsa-miR-26a-5p	1
hsa_circ_0002744	hsa-miR-26a-5p	1
hsa_circ_0007523	hsa-miR-26a-5p	1
hsa_circ_0025034	hsa-miR-26a-5p	1
hsa_circ_0001784	hsa-miR-27a-3p	1
hsa_circ_0001868	hsa-miR-27a-3p	1
hsa_circ_0024843	hsa-let-7d-5p	1
hsa_circ_0020340	hsa-miR-26a-5p	1
hsa_circ_0006109	hsa-miR-19a-3p	1
hsa_circ_0027994	hsa-miR-93-5p	1
hsa_circ_0084135	hsa-miR-20a-5p	1
hsa_circ_0001944	hsa-miR-20a-5p	1
hsa_circ_0020340	hsa-miR-20a-5p	1
hsa_circ_0027994	hsa-miR-20a-5p	1
hsa_circ_0078607	hsa-miR-19a-3p	1
hsa_circ_0007771	hsa-miR-19a-3p	1
hsa_circ_0004405	hsa-miR-20a-5p	1
hsa_circ_0020340	hsa-miR-93-5p	1
hsa_circ_0002744	hsa-miR-26b-5p	1
hsa_circ_0003304	hsa-miR-26b-5p	1
hsa_circ_0001767	hsa-miR-27a-3p	1
hsa_circ_0069443	hsa-let-7d-5p	1
hsa_circ_0017521	hsa-let-7d-5p	1
hsa_circ_0026782	hsa-let-7d-5p	1
hsa_circ_0006867	hsa-let-7d-5p	1
hsa_circ_0057090	hsa-miR-27a-3p	1
hsa_circ_0069982	hsa-miR-27a-3p	1
hsa_circ_0057090	hsa-miR-26b-5p	1
hsa_circ_0006867	hsa-miR-26b-5p	1
hsa_circ_0004466	hsa-miR-93-5p	1
hsa_circ_0017438	hsa-let-7d-5p	1
hsa_circ_0073057	hsa-miR-20a-5p	1
hsa_circ_0004841	hsa-miR-93-5p	1
hsa_circ_0001495	hsa-miR-20a-5p	1
hsa_circ_0009172	hsa-miR-27a-3p	1
hsa_circ_0007523	hsa-miR-19a-3p	1
hsa_circ_0078607	hsa-miR-19b-3p	1
hsa_circ_0007771	hsa-miR-19b-3p	1
hsa_circ_0073057	hsa-miR-93-5p	1
hsa_circ_0084135	hsa-miR-93-5p	1
hsa_circ_0001944	hsa-miR-93-5p	1
hsa_circ_0005620	hsa-miR-27a-3p	1
hsa_circ_0008038	hsa-miR-19a-3p	1
hsa_circ_0030694	hsa-miR-19a-3p	1
hsa_circ_0046999	hsa-miR-19a-3p	1
hsa_circ_0005111	hsa-miR-96-5p	1
hsa_circ_0005620	hsa-miR-96-5p	1
hsa_circ_0007947	hsa-miR-96-5p	1
hsa_circ_0007523	hsa-miR-20a-5p	1
hsa_circ_0006109	hsa-miR-19b-3p	1
hsa_circ_0004841	hsa-miR-20a-5p	1
hsa_circ_0002452	hsa-miR-96-5p	1
hsa_circ_0056558	hsa-miR-27a-3p	1
hsa_circ_0042335	hsa-miR-27a-3p	1
hsa_circ_0000799	hsa-let-7d-5p	1
hsa_circ_0004841	hsa-let-7d-5p	1
hsa_circ_0004047	hsa-let-7d-5p	1
hsa_circ_0006151	hsa-miR-27a-3p	1
hsa_circ_0027702	hsa-miR-27a-3p	1
hsa_circ_0001273	hsa-miR-27a-3p	1
hsa_circ_0068708	hsa-miR-27a-3p	1
hsa_circ_0004841	hsa-miR-96-5p	1
hsa_circ_0025034	hsa-miR-96-5p	1
hsa_circ_0015136	hsa-let-7d-5p	1
hsa_circ_0004720	hsa-miR-20a-5p	1
hsa_circ_0002452	hsa-miR-21-5p	1
hsa_circ_0004191	hsa-miR-21-5p	1
hsa_circ_0057608	hsa-miR-21-5p	1
hsa_circ_0077837	hsa-miR-21-5p	1
hsa_circ_0007523	hsa-miR-21-5p	1
hsa_circ_0004841	hsa-miR-98-5p	1
hsa_circ_0060521	hsa-miR-101-3p	1
hsa_circ_0006867	hsa-let-7b-5p	1
hsa_circ_0069443	hsa-let-7b-5p	1
hsa_circ_0026782	hsa-let-7b-5p	1
hsa_circ_0024271	hsa-let-7b-5p	1
hsa_circ_0005367	hsa-let-7b-5p	1
hsa_circ_0004772	hsa-let-7b-5p	1
hsa_circ_0015136	hsa-let-7f-5p	1
hsa_circ_0017438	hsa-let-7f-5p	1
hsa_circ_0004047	hsa-let-7e-5p	1
hsa_circ_0024271	hsa-let-7e-5p	1
hsa_circ_0004511	hsa-miR-101-3p	1
hsa_circ_0084135	hsa-miR-101-3p	1
hsa_circ_0004047	hsa-let-7c-5p	1
hsa_circ_0017521	hsa-let-7e-5p	1
hsa_circ_0026782	hsa-let-7e-5p	1
hsa_circ_0017521	hsa-let-7c-5p	1
hsa_circ_0026782	hsa-let-7c-5p	1
hsa_circ_0023644	hsa-miR-101-3p	1
hsa_circ_0001554	hsa-miR-101-3p	1
hsa_circ_0004720	hsa-miR-101-3p	1
hsa_circ_0004513	hsa-miR-101-3p	1
hsa_circ_0024843	hsa-miR-98-5p	1
hsa_circ_0069443	hsa-let-7c-5p	1
hsa_circ_0004841	hsa-let-7c-5p	1
hsa_circ_0000799	hsa-let-7c-5p	1
hsa_circ_0017438	hsa-let-7c-5p	1
hsa_circ_0006867	hsa-let-7c-5p	1
hsa_circ_0017521	hsa-miR-98-5p	1
hsa_circ_0017438	hsa-miR-98-5p	1
hsa_circ_0069443	hsa-miR-98-5p	1
hsa_circ_0024271	hsa-miR-98-5p	1
hsa_circ_0024843	hsa-let-7f-5p	1
hsa_circ_0069443	hsa-let-7f-5p	1
hsa_circ_0000799	hsa-let-7e-5p	1
hsa_circ_0004841	hsa-let-7e-5p	1
hsa_circ_0015136	hsa-let-7a-5p	1
hsa_circ_0006867	hsa-let-7e-5p	1
hsa_circ_0004772	hsa-let-7f-5p	1
hsa_circ_0006867	hsa-let-7f-5p	1
hsa_circ_0005367	hsa-miR-98-5p	1
hsa_circ_0003730	hsa-miR-98-5p	1
hsa_circ_0004772	hsa-miR-98-5p	1
hsa_circ_0006867	hsa-miR-98-5p	1
hsa_circ_0024843	hsa-let-7b-5p	1
hsa_circ_0017438	hsa-let-7b-5p	1
hsa_circ_0017521	hsa-let-7b-5p	1
hsa_circ_0024843	hsa-let-7c-5p	1
hsa_circ_0000799	hsa-let-7b-5p	1
hsa_circ_0004841	hsa-let-7b-5p	1
hsa_circ_0026782	hsa-let-7a-5p	1
hsa_circ_0004047	hsa-let-7a-5p	1
hsa_circ_0000799	hsa-let-7a-5p	1
hsa_circ_0004841	hsa-let-7a-5p	1
hsa_circ_0015136	hsa-let-7b-5p	1
hsa_circ_0004047	hsa-let-7b-5p	1
hsa_circ_0003730	hsa-let-7b-5p	1
hsa_circ_0017521	hsa-let-7a-5p	1
hsa_circ_0024843	hsa-let-7e-5p	1
hsa_circ_0005367	hsa-let-7f-5p	1
hsa_circ_0003730	hsa-let-7f-5p	1
hsa_circ_0069443	hsa-let-7e-5p	1
hsa_circ_0003730	hsa-let-7e-5p	1
hsa_circ_0004841	hsa-let-7f-5p	1
hsa_circ_0024271	hsa-let-7f-5p	1
hsa_circ_0004772	hsa-let-7a-5p	1
hsa_circ_0006867	hsa-let-7a-5p	1
hsa_circ_0069443	hsa-let-7a-5p	1
hsa_circ_0024271	hsa-let-7a-5p	1
hsa_circ_0024843	hsa-let-7a-5p	1
hsa_circ_0017438	hsa-let-7a-5p	1
hsa_circ_0003730	hsa-let-7a-5p	1
hsa_circ_0005367	hsa-let-7a-5p	1
hsa_circ_0005367	hsa-let-7e-5p	1
hsa_circ_0004772	hsa-let-7e-5p	1
hsa_circ_0017438	hsa-let-7e-5p	1
hsa_circ_0017521	hsa-let-7f-5p	1
hsa_circ_0026782	hsa-let-7f-5p	1
hsa_circ_0015136	hsa-let-7e-5p	1
hsa_circ_0026782	hsa-miR-98-5p	1
hsa_circ_0000799	hsa-miR-98-5p	1
hsa_circ_0004047	hsa-miR-98-5p	1
hsa_circ_0005367	hsa-let-7c-5p	1
hsa_circ_0003730	hsa-let-7c-5p	1
hsa_circ_0024271	hsa-let-7c-5p	1
hsa_circ_0000799	hsa-let-7f-5p	1
hsa_circ_0004047	hsa-let-7f-5p	1
hsa_circ_0004772	hsa-let-7c-5p	1
hsa_circ_0015136	hsa-let-7c-5p	1
hsa_circ_0015136	hsa-miR-98-5p	1
hsa_circ_0057602	hsa-miR-28-5p	1
hsa_circ_0054716	hsa-miR-28-5p	1
hsa_circ_0007947	hsa-miR-28-5p	1
hsa_circ_0001944	hsa-miR-106a-5p	1
hsa_circ_0020340	hsa-miR-106a-5p	1
hsa_circ_0004194	hsa-miR-28-5p	1
hsa_circ_0011167	hsa-miR-28-5p	1
hsa_circ_0011168	hsa-miR-28-5p	1
hsa_circ_0059484	hsa-miR-28-5p	1
hsa_circ_0073057	hsa-miR-17-5p	1
hsa_circ_0001944	hsa-miR-17-5p	1
hsa_circ_0020340	hsa-miR-17-5p	1
hsa_circ_0027994	hsa-miR-17-5p	1
hsa_circ_0084135	hsa-miR-17-5p	1
hsa_circ_0004466	hsa-miR-17-5p	1
hsa_circ_0004191	hsa-miR-17-5p	1
hsa_circ_0074719	hsa-miR-17-5p	1
hsa_circ_0001495	hsa-miR-17-5p	1
hsa_circ_0073057	hsa-miR-106a-5p	1
hsa_circ_0084135	hsa-miR-106a-5p	1
hsa_circ_0007523	hsa-miR-106a-5p	1
hsa_circ_0004720	hsa-miR-17-5p	1
hsa_circ_0007523	hsa-miR-17-5p	1
hsa_circ_0074719	hsa-miR-106a-5p	1
hsa_circ_0000408	hsa-miR-28-5p	1
hsa_circ_0002205	hsa-miR-28-5p	1
hsa_circ_0000799	hsa-miR-28-5p	1
hsa_circ_0001495	hsa-miR-106a-5p	1
hsa_circ_0004405	hsa-miR-106a-5p	1
hsa_circ_0004841	hsa-miR-17-5p	1
hsa_circ_0004191	hsa-miR-106a-5p	1
hsa_circ_0023644	hsa-miR-28-5p	1
hsa_circ_0024951	hsa-miR-28-5p	1
hsa_circ_0005620	hsa-miR-28-5p	1
hsa_circ_0025534	hsa-miR-28-5p	1
hsa_circ_0002744	hsa-miR-28-5p	1
hsa_circ_0001554	hsa-miR-28-5p	1
hsa_circ_0073057	hsa-miR-28-5p	1
hsa_circ_0004720	hsa-miR-106a-5p	1
hsa_circ_0004466	hsa-miR-106a-5p	1
hsa_circ_0027994	hsa-miR-106a-5p	1
hsa_circ_0004841	hsa-miR-106a-5p	1
hsa_circ_0004405	hsa-miR-17-5p	1
hsa_circ_0008038	hsa-miR-25-3p	1
hsa_circ_0073762	hsa-miR-25-3p	1
hsa_circ_0073761	hsa-miR-25-3p	1
hsa_circ_0007516	hsa-miR-25-3p	1
hsa_circ_0004194	hsa-miR-25-3p	1
hsa_circ_0078607	hsa-miR-25-3p	1
hsa_circ_0074719	hsa-miR-25-3p	1
hsa_circ_0037806	hsa-miR-25-3p	1
hsa_circ_0024168	hsa-miR-25-3p	1
hsa_circ_0025534	hsa-miR-25-3p	1
hsa_circ_0007516	hsa-miR-105-5p	1
hsa_circ_0004047	hsa-miR-105-5p	1
hsa_circ_0059484	hsa-miR-105-5p	1
hsa_circ_0002744	hsa-miR-105-5p	1
hsa_circ_0003520	hsa-miR-105-5p	1
hsa_circ_0000373	hsa-miR-105-5p	1
hsa_circ_0004513	hsa-miR-105-5p	1
hsa_circ_0008609	hsa-miR-105-5p	1
hsa_circ_0008038	hsa-miR-105-5p	1
hsa_circ_0046999	hsa-miR-105-5p	1
hsa_circ_0073761	hsa-miR-32-5p	1
hsa_circ_0073762	hsa-miR-32-5p	1
hsa_circ_0004194	hsa-miR-32-5p	1
hsa_circ_0007516	hsa-miR-32-5p	1
hsa_circ_0074719	hsa-miR-32-5p	1
hsa_circ_0078607	hsa-miR-32-5p	1
hsa_circ_0037806	hsa-miR-32-5p	1
hsa_circ_0008038	hsa-miR-32-5p	1
hsa_circ_0024168	hsa-miR-32-5p	1
hsa_circ_0077837	hsa-miR-24-1-5p	1
hsa_circ_0025909	hsa-miR-24-1-5p	1
hsa_circ_0037806	hsa-miR-92a-3p	1
hsa_circ_0025534	hsa-miR-92a-3p	1
hsa_circ_0004194	hsa-miR-92a-3p	1
hsa_circ_0073761	hsa-miR-92a-3p	1
hsa_circ_0073762	hsa-miR-92a-3p	1
hsa_circ_0074719	hsa-miR-92a-3p	1
hsa_circ_0007516	hsa-miR-92a-3p	1
hsa_circ_0078607	hsa-miR-92a-3p	1
hsa_circ_0024168	hsa-miR-92a-3p	1
hsa_circ_0008038	hsa-miR-92a-3p	1
hsa_circ_0008066	hsa-miR-22-3p	1
hsa_circ_0008192	hsa-miR-17-3p	1
hsa_circ_0006034	hsa-miR-17-3p	1
hsa_circ_0002744	hsa-miR-17-3p	1
hsa_circ_0001868	hsa-miR-17-3p	1
hsa_circ_0004085	hsa-miR-17-3p	1
hsa_circ_0007337	hsa-miR-17-3p	1
hsa_circ_0064871	hsa-miR-17-3p	1
hsa_circ_0004191	hsa-miR-17-3p	1
hsa_circ_0005239	hsa-miR-17-3p	1
hsa_circ_0003458	hsa-miR-17-3p	1
hsa_circ_0001821	hsa-miR-17-3p	1
hsa_circ_0079380	hsa-miR-17-3p	1
hsa_circ_0001944	hsa-miR-17-3p	1
hsa_circ_0005260	hsa-miR-22-3p	1
hsa_circ_0008132	hsa-miR-22-3p	1
hsa_circ_0008647	hsa-miR-22-3p	1
hsa_circ_0069621	hsa-miR-22-3p	1
hsa_circ_0006528	hsa-miR-22-3p	1
hsa_circ_0003949	hsa-miR-22-3p	1
hsa_circ_0001707	hsa-miR-22-3p	1
hsa_circ_0004774	hsa-miR-22-3p	1
hsa_circ_0007771	hsa-miR-22-3p	1
hsa_circ_0003304	hsa-miR-22-3p	1
hsa_circ_0001847	hsa-miR-22-3p	1
hsa_circ_0005620	hsa-miR-22-3p	1
hsa_circ_0005844	hsa-miR-22-3p	1
hsa_circ_0059484	hsa-miR-22-3p	1
hsa_circ_0000131	hsa-miR-22-3p	1
hsa_circ_0004085	hsa-miR-22-3p	1
hsa_circ_0061776	hsa-miR-17-3p	1
hsa_circ_0059473	hsa-miR-17-3p	1
hsa_circ_0063534	hsa-miR-17-3p	1
hsa_circ_0002452	hsa-miR-22-3p	1
hsa_circ_0068651	hsa-miR-22-3p	1
hsa_circ_0005311	hsa-miR-22-3p	1
hsa_circ_0006559	hsa-miR-22-3p	1
hsa_circ_0000374	hsa-miR-22-3p	1
hsa_circ_0002793	hsa-miR-17-3p	1
hsa_circ_0003028	hsa-miR-17-3p	1
hsa_circ_0007523	hsa-miR-17-3p	1
hsa_circ_0040414	hsa-miR-17-3p	1
hsa_circ_0004841	hsa-miR-17-3p	1
hsa_circ_0020340	hsa-miR-17-3p	1
hsa_circ_0004085	hsa-miR-95-3p	1
hsa_circ_0003520	hsa-miR-95-3p	1
hsa_circ_0002902	hsa-miR-95-3p	1
hsa_circ_0059957	hsa-miR-95-3p	1
hsa_circ_0038074	hsa-miR-107	1
S100P	hsa-miR-24-3p	1
ETV4	hsa-miR-29a-3p	1
ETV4	hsa-miR-29b-3p	1
RNF43	hsa-miR-23a-3p	1
RNF43	hsa-miR-16-5p	1
RNF43	hsa-miR-15a-5p	1
RNF43	hsa-miR-18a-5p	1
FERMT1	hsa-miR-107	1
FERMT1	hsa-miR-16-5p	1
FERMT1	hsa-miR-15a-5p	1
FERMT1	hsa-miR-31-5p	1
FERMT1	hsa-miR-18a-5p	1
CYP2S1	hsa-miR-103a-3p	1
CYP2S1	hsa-miR-107	1
CYP2S1	hsa-miR-16-5p	1
CYP2S1	hsa-miR-15a-5p	1
UBE2C	hsa-miR-103a-3p	1
UBE2C	hsa-miR-107	1
UBE2C	hsa-miR-33a-5p	1
MYBL2	hsa-miR-29a-3p	1
MYBL2	hsa-miR-30a-3p	1
MYBL2	hsa-miR-29b-3p	1
MYBL2	hsa-miR-30a-5p	1
MAL2	hsa-miR-20a-5p	1
MAL2	hsa-miR-23a-3p	1
MAL2	hsa-miR-93-5p	1
MAL2	hsa-miR-26a-5p	1
MAL2	hsa-let-7d-5p	1
MAL2	hsa-miR-19b-3p	1
MAL2	hsa-miR-29a-3p	1
MAL2	hsa-miR-27a-3p	1
MAL2	hsa-miR-26b-5p	1
MAL2	hsa-miR-19a-3p	1
MAL2	hsa-miR-96-5p	1
EPCAM	hsa-miR-26a-5p	1
EPCAM	hsa-miR-26b-5p	1
EPCAM	hsa-miR-21-5p	1
CDH1	hsa-miR-23a-3p	1
CLDN1	hsa-miR-103a-3p	1
CLDN1	hsa-miR-19b-3p	1
CLDN1	hsa-miR-107	1
CLDN1	hsa-miR-98-5p	1
CLDN1	hsa-miR-101-3p	1
CLDN1	hsa-let-7b-5p	1
CLDN1	hsa-let-7d-5p	1
CLDN1	hsa-miR-29a-3p	1
CLDN1	hsa-let-7f-5p	1
CLDN1	hsa-miR-15a-5p	1
CLDN1	hsa-let-7e-5p	1
CLDN1	hsa-miR-29b-3p	1
CLDN1	hsa-let-7c-5p	1
CLDN1	hsa-miR-19a-3p	1
CLDN1	hsa-let-7a-5p	1
CLDN1	hsa-miR-96-5p	1
CLDN1	hsa-miR-21-5p	1
RRM2	hsa-miR-20a-5p	1
RRM2	hsa-miR-23a-3p	1
RRM2	hsa-miR-28-5p	1
RRM2	hsa-miR-106a-5p	1
RRM2	hsa-miR-93-5p	1
RRM2	hsa-miR-98-5p	1
RRM2	hsa-let-7b-5p	1
RRM2	hsa-let-7d-5p	1
RRM2	hsa-miR-17-5p	1
RRM2	hsa-let-7f-5p	1
RRM2	hsa-let-7e-5p	1
RRM2	hsa-let-7c-5p	1
RRM2	hsa-miR-30a-5p	1
RRM2	hsa-let-7a-5p	1
RNF128	hsa-miR-20a-5p	1
RNF128	hsa-miR-103a-3p	1
RNF128	hsa-miR-106a-5p	1
RNF128	hsa-miR-107	1
RNF128	hsa-miR-93-5p	1
RNF128	hsa-miR-101-3p	1
RNF128	hsa-miR-26a-5p	1
RNF128	hsa-miR-16-5p	1
RNF128	hsa-miR-17-5p	1
RNF128	hsa-miR-15a-5p	1
RNF128	hsa-miR-26b-5p	1
RNF128	hsa-miR-27a-3p	1
RNF128	hsa-miR-33a-5p	1
RNF128	hsa-miR-25-3p	1
RNF128	hsa-miR-21-5p	1
SOX9	hsa-miR-103a-3p	1
SOX9	hsa-miR-106a-5p	1
SOX9	hsa-miR-107	1
SOX9	hsa-miR-93-5p	1
SOX9	hsa-miR-101-3p	1
SOX9	hsa-let-7d-5p	1
SOX9	hsa-miR-16-5p	1
SOX9	hsa-miR-19b-3p	1
SOX9	hsa-miR-15a-5p	1
SOX9	hsa-miR-29b-3p	1
SOX9	hsa-miR-27a-3p	1
SOX9	hsa-miR-30a-5p	1
SOX9	hsa-miR-19a-3p	1
SOX9	hsa-miR-105-5p	1
TPX2	hsa-miR-106a-5p	1
TPX2	hsa-miR-93-5p	1
TPX2	hsa-miR-26a-5p	1
TPX2	hsa-miR-27a-3p	1
TPX2	hsa-miR-26b-5p	1
TPX2	hsa-miR-32-5p	1
TPX2	hsa-miR-25-3p	1
DSG2	hsa-miR-103a-3p	1
DSG2	hsa-miR-107	1
DSG2	hsa-miR-16-5p	1
DSG2	hsa-miR-29a-3p	1
DSG2	hsa-miR-15a-5p	1
DSG2	hsa-miR-29b-3p	1
DSG2	hsa-miR-30a-5p	1
DSG2	hsa-miR-96-5p	1
SPINT2	hsa-let-7d-5p	1
PRSS22	hsa-miR-98-5p	1
PRSS22	hsa-let-7b-5p	1
PRSS22	hsa-let-7d-5p	1
PRSS22	hsa-let-7f-5p	1
PRSS22	hsa-let-7e-5p	1
PRSS22	hsa-let-7c-5p	1
PRSS22	hsa-let-7a-5p	1
SERPINB5	hsa-miR-20a-5p	1
SERPINB5	hsa-miR-106a-5p	1
SERPINB5	hsa-miR-93-5p	1
SERPINB5	hsa-miR-17-5p	1
SERPINB5	hsa-miR-21-5p	1
CDX2	hsa-miR-24-3p	1
CDCA7	hsa-miR-20a-5p	1
CDCA7	hsa-miR-106a-5p	1
CDCA7	hsa-miR-93-5p	1
CDCA7	hsa-miR-101-3p	1
CDCA7	hsa-miR-16-5p	1
CDCA7	hsa-miR-17-5p	1
CDCA7	hsa-miR-30a-5p	1
CA9	hsa-miR-96-5p	1
SDC1	hsa-miR-28-5p	1
SDC1	hsa-miR-19b-3p	1
SDC1	hsa-miR-30a-3p	1
SDC1	hsa-miR-31-5p	1
SDC1	hsa-miR-19a-3p	1
KIAA0101	hsa-miR-103a-3p	1
KIAA0101	hsa-miR-19b-3p	1
KIAA0101	hsa-miR-107	1
KIAA0101	hsa-miR-98-5p	1
KIAA0101	hsa-let-7b-5p	1
KIAA0101	hsa-let-7d-5p	1
KIAA0101	hsa-miR-16-5p	1
KIAA0101	hsa-miR-29a-3p	1
KIAA0101	hsa-miR-15a-5p	1
KIAA0101	hsa-miR-29b-3p	1
KIAA0101	hsa-miR-31-5p	1
KIAA0101	hsa-miR-30a-5p	1
KIAA0101	hsa-miR-19a-3p	1
KIAA0101	hsa-let-7a-5p	1
KIAA0101	hsa-miR-24-1-5p	1
KIAA0101	hsa-miR-96-5p	1
KIAA0101	hsa-miR-18a-5p	1
GPRC5A	hsa-miR-30a-3p	1
GPRC5A	hsa-miR-32-5p	1
GPRC5A	hsa-miR-92a-3p	1
GPRC5A	hsa-miR-31-5p	1
GPRC5A	hsa-miR-25-3p	1
PCSK9	hsa-miR-106a-5p	1
PCSK9	hsa-let-7d-5p	1
PCSK9	hsa-miR-29b-3p	1
PCSK9	hsa-miR-32-5p	1
PCSK9	hsa-miR-25-3p	1
GALNT3	hsa-miR-20a-5p	1
GALNT3	hsa-miR-22-3p	1
GALNT3	hsa-miR-106a-5p	1
GALNT3	hsa-miR-93-5p	1
GALNT3	hsa-miR-98-5p	1
GALNT3	hsa-miR-26a-5p	1
GALNT3	hsa-let-7b-5p	1
GALNT3	hsa-miR-17-5p	1
GALNT3	hsa-miR-19b-3p	1
GALNT3	hsa-miR-27a-3p	1
GALNT3	hsa-miR-26b-5p	1
GALNT3	hsa-miR-17-3p	1
GALNT3	hsa-miR-30a-5p	1
GALNT3	hsa-miR-19a-3p	1
GALNT3	hsa-miR-33a-5p	1
TDGF1	hsa-let-7e-5p	1
TRIM29	hsa-let-7b-5p	1
TRIM29	hsa-miR-31-5p	1
TRIM29	hsa-let-7c-5p	1
HOXB9	hsa-miR-28-5p	1
HOXB9	hsa-miR-31-5p	1
HOXB9	hsa-miR-33a-5p	1
PLEK2	hsa-miR-103a-3p	1
PLEK2	hsa-miR-107	1
PLEK2	hsa-miR-31-5p	1
CXCL1	hsa-miR-27a-3p	1
GYLTL1B	hsa-miR-16-5p	1
GYLTL1B	hsa-miR-15a-5p	1
CCNB1	hsa-miR-103a-3p	1
CCNB1	hsa-miR-107	1
CCNB1	hsa-miR-93-5p	1
CCNB1	hsa-miR-16-5p	1
CCNB1	hsa-miR-15a-5p	1
NEK2	hsa-miR-93-5p	1
NEK2	hsa-miR-27a-3p	1
NEK2	hsa-miR-31-5p	1
NEK2	hsa-miR-92a-3p	1
ASF1B	hsa-miR-20a-5p	1
ASF1B	hsa-miR-103a-3p	1
ASF1B	hsa-miR-106a-5p	1
ASF1B	hsa-miR-107	1
ASF1B	hsa-miR-93-5p	1
ASF1B	hsa-miR-24-3p	1
ASF1B	hsa-let-7d-5p	1
ASF1B	hsa-miR-17-5p	1
ASF1B	hsa-miR-29b-3p	1
BIRC5	hsa-miR-28-5p	1
BIRC5	hsa-miR-103a-3p	1
BIRC5	hsa-miR-107	1
BIRC5	hsa-miR-16-5p	1
BIRC5	hsa-miR-29b-3p	1
BIRC5	hsa-miR-31-5p	1
TOP2A	hsa-miR-23a-3p	1
TOP2A	hsa-miR-101-3p	1
TOP2A	hsa-miR-98-5p	1
TOP2A	hsa-miR-24-3p	1
TOP2A	hsa-miR-26a-5p	1
TOP2A	hsa-let-7b-5p	1
TOP2A	hsa-let-7d-5p	1
TOP2A	hsa-let-7f-5p	1
TOP2A	hsa-let-7e-5p	1
TOP2A	hsa-miR-26b-5p	1
TOP2A	hsa-let-7c-5p	1
TOP2A	hsa-miR-21-5p	1
TOP2A	hsa-let-7a-5p	1
TOP2A	hsa-miR-96-5p	1
LAMB3	hsa-miR-24-3p	1
TESC	hsa-miR-20a-5p	1
TESC	hsa-miR-106a-5p	1
TESC	hsa-miR-93-5p	1
TESC	hsa-miR-17-5p	1
TESC	hsa-miR-18a-5p	1
IL22RA1	hsa-miR-98-5p	1
IL22RA1	hsa-let-7b-5p	1
IL22RA1	hsa-let-7d-5p	1
IL22RA1	hsa-let-7e-5p	1
IL22RA1	hsa-let-7f-5p	1
IL22RA1	hsa-let-7c-5p	1
IL22RA1	hsa-let-7a-5p	1
MKI67	hsa-miR-106a-5p	1
MKI67	hsa-miR-17-5p	1
MKI67	hsa-miR-18a-5p	1
TSPAN8	hsa-miR-103a-3p	1
TSPAN8	hsa-miR-107	1
CDK1	hsa-miR-26a-5p	1
CDK1	hsa-miR-26b-5p	1
CDK1	hsa-miR-31-5p	1
CDK1	hsa-miR-101-3p	1
MYEOV	hsa-miR-28-5p	1
MYEOV	hsa-miR-105-5p	1
MYEOV	hsa-miR-24-1-5p	1
PRR15	hsa-miR-20a-5p	1
PRR15	hsa-miR-106a-5p	1
PRR15	hsa-miR-93-5p	1
PRR15	hsa-miR-17-5p	1
PRR15	hsa-let-7f-5p	1
PRR15	hsa-miR-15a-5p	1
PRR15	hsa-miR-33a-5p	1
PRR15	hsa-miR-18a-5p	1
CHMP4C	hsa-miR-103a-3p	1
CHMP4C	hsa-miR-107	1
CHMP4C	hsa-miR-26a-5p	1
CHMP4C	hsa-miR-16-5p	1
CHMP4C	hsa-miR-15a-5p	1
CHMP4C	hsa-miR-26b-5p	1
ESRP1	hsa-let-7b-5p	1
ESRP1	hsa-let-7d-5p	1
ESRP1	hsa-miR-16-5p	1
ESRP1	hsa-let-7f-5p	1
ESRP1	hsa-let-7e-5p	1
ESRP1	hsa-miR-15a-5p	1
ESRP1	hsa-let-7c-5p	1
ESRP1	hsa-miR-32-5p	1
ESRP1	hsa-miR-92a-3p	1
ESRP1	hsa-miR-98-5p	1
ESRP1	hsa-miR-25-3p	1
ESRP1	hsa-let-7a-5p	1
ESRP1	hsa-miR-18a-5p	1
TMEM45B	hsa-miR-103a-3p	1
TMEM45B	hsa-miR-107	1
TMEM45B	hsa-let-7b-5p	1
TMEM45B	hsa-miR-16-5p	1
TMEM45B	hsa-miR-15a-5p	1
TMEM45B	hsa-let-7c-5p	1
MAD2L1	hsa-miR-23a-3p	1
MAD2L1	hsa-miR-28-5p	1
MAD2L1	hsa-miR-101-3p	1
MAD2L1	hsa-miR-26a-5p	1
MAD2L1	hsa-miR-19b-3p	1
MAD2L1	hsa-miR-27a-3p	1
MAD2L1	hsa-miR-26b-5p	1
MAD2L1	hsa-miR-19a-3p	1
KLF5	hsa-miR-23a-3p	1
KLF5	hsa-miR-103a-3p	1
KLF5	hsa-miR-107	1
KLF5	hsa-miR-101-3p	1
KLF5	hsa-miR-26a-5p	1
KLF5	hsa-miR-16-5p	1
KLF5	hsa-miR-26b-5p	1
KLF5	hsa-miR-32-5p	1
KLF5	hsa-miR-92a-3p	1
KLF5	hsa-miR-30a-5p	1
KLF5	hsa-miR-25-3p	1
KLF5	hsa-miR-96-5p	1
KLF5	hsa-miR-21-5p	1
GGH	hsa-miR-23a-3p	1
VSNL1	hsa-let-7d-5p	1
VSNL1	hsa-let-7f-5p	1
VSNL1	hsa-miR-21-5p	1
CKS2	hsa-miR-26a-5p	1
CKS2	hsa-miR-26b-5p	1
CKS2	hsa-miR-32-5p	1
CKS2	hsa-miR-30a-5p	1
CKS2	hsa-miR-33a-5p	1
CKS2	hsa-miR-21-5p	1
EPHB2	hsa-miR-27a-3p	1
TRIB3	hsa-miR-20a-5p	1
TRIB3	hsa-miR-106a-5p	1
TRIB3	hsa-miR-24-3p	1
TRIB3	hsa-let-7d-5p	1
TRIB3	hsa-miR-17-5p	1
TRIB3	hsa-miR-30a-5p	1
TRIB3	hsa-miR-96-5p	1
TRIB3	hsa-miR-18a-5p	1
PI3	hsa-miR-28-5p	1
MAP7	hsa-miR-20a-5p	1
MAP7	hsa-miR-23a-3p	1
MAP7	hsa-miR-28-5p	1
MAP7	hsa-miR-103a-3p	1
MAP7	hsa-miR-106a-5p	1
MAP7	hsa-miR-107	1
MAP7	hsa-miR-93-5p	1
MAP7	hsa-miR-98-5p	1
MAP7	hsa-miR-24-3p	1
MAP7	hsa-miR-26a-5p	1
MAP7	hsa-let-7b-5p	1
MAP7	hsa-let-7d-5p	1
MAP7	hsa-miR-16-5p	1
MAP7	hsa-miR-17-5p	1
MAP7	hsa-let-7f-5p	1
MAP7	hsa-miR-15a-5p	1
MAP7	hsa-let-7e-5p	1
MAP7	hsa-miR-26b-5p	1
MAP7	hsa-let-7c-5p	1
MAP7	hsa-let-7a-5p	1
HMGA1	hsa-miR-103a-3p	1
HMGA1	hsa-miR-107	1
HMGA1	hsa-miR-98-5p	1
HMGA1	hsa-miR-26a-5p	1
HMGA1	hsa-let-7b-5p	1
HMGA1	hsa-let-7d-5p	1
HMGA1	hsa-miR-16-5p	1
HMGA1	hsa-let-7f-5p	1
HMGA1	hsa-let-7e-5p	1
HMGA1	hsa-miR-15a-5p	1
HMGA1	hsa-miR-26b-5p	1
HMGA1	hsa-miR-31-5p	1
HMGA1	hsa-let-7c-5p	1
HMGA1	hsa-let-7a-5p	1
HMGA1	hsa-miR-96-5p	1
EHF	hsa-miR-24-3p	1
EHF	hsa-miR-26a-5p	1
EHF	hsa-miR-27a-3p	1
EHF	hsa-miR-26b-5p	1
F2RL1	hsa-miR-103a-3p	1
F2RL1	hsa-miR-107	1
F2RL1	hsa-miR-26a-5p	1
F2RL1	hsa-miR-16-5p	1
F2RL1	hsa-miR-15a-5p	1
F2RL1	hsa-miR-26b-5p	1
F2RL1	hsa-miR-33a-5p	1
F2RL1	hsa-miR-96-5p	1
PLS1	hsa-miR-20a-5p	1
PLS1	hsa-miR-106a-5p	1
PLS1	hsa-miR-93-5p	1
PLS1	hsa-miR-16-5p	1
PLS1	hsa-miR-17-5p	1
PLS1	hsa-miR-19b-3p	1
PLS1	hsa-miR-15a-5p	1
PLS1	hsa-miR-30a-5p	1
PLS1	hsa-miR-19a-3p	1
PLS1	hsa-miR-25-3p	1
KRT80	hsa-miR-29a-3p	1
KRT80	hsa-miR-29b-3p	1
MYO5B	hsa-miR-20a-5p	1
MYO5B	hsa-miR-23a-3p	1
MYO5B	hsa-miR-103a-3p	1
MYO5B	hsa-miR-106a-5p	1
MYO5B	hsa-miR-107	1
MYO5B	hsa-miR-93-5p	1
MYO5B	hsa-miR-16-5p	1
MYO5B	hsa-miR-17-5p	1
MYO5B	hsa-miR-19b-3p	1
MYO5B	hsa-miR-15a-5p	1
MYO5B	hsa-miR-27a-3p	1
MYO5B	hsa-miR-19a-3p	1
MYO5B	hsa-miR-18a-5p	1
AGMAT	hsa-miR-101-3p	1
CDC6	hsa-miR-26a-5p	1
CDC6	hsa-let-7d-5p	1
CDC6	hsa-miR-26b-5p	1
CDC6	hsa-miR-31-5p	1
CDC6	hsa-miR-19a-3p	1
ZWINT	hsa-let-7e-5p	1
ZWINT	hsa-miR-27a-3p	1
ZWINT	hsa-miR-17-3p	1
CEP55	hsa-miR-103a-3p	1
CEP55	hsa-miR-19b-3p	1
CEP55	hsa-miR-107	1
CEP55	hsa-miR-101-3p	1
CEP55	hsa-miR-26a-5p	1
CEP55	hsa-let-7b-5p	1
CEP55	hsa-miR-16-5p	1
CEP55	hsa-let-7e-5p	1
CEP55	hsa-miR-15a-5p	1
CEP55	hsa-let-7c-5p	1
CEP55	hsa-miR-26b-5p	1
CEP55	hsa-miR-19a-3p	1
CEP55	hsa-let-7a-5p	1
CGREF1	hsa-miR-22-3p	1
AURKA	hsa-miR-93-5p	1
AURKA	hsa-miR-98-5p	1
AURKA	hsa-let-7b-5p	1
AURKA	hsa-let-7d-5p	1
AURKA	hsa-let-7f-5p	1
AURKA	hsa-let-7e-5p	1
AURKA	hsa-let-7c-5p	1
AURKA	hsa-miR-32-5p	1
AURKA	hsa-miR-92a-3p	1
AURKA	hsa-miR-25-3p	1
AURKA	hsa-let-7a-5p	1
TK1	hsa-miR-93-5p	1
TK1	hsa-miR-98-5p	1
TK1	hsa-let-7b-5p	1
TK1	hsa-let-7d-5p	1
TK1	hsa-let-7e-5p	1
TK1	hsa-let-7f-5p	1
TK1	hsa-let-7c-5p	1
TK1	hsa-let-7a-5p	1
TK1	hsa-miR-18a-5p	1
CXADR	hsa-miR-28-5p	1
CXADR	hsa-miR-103a-3p	1
CXADR	hsa-miR-107	1
CXADR	hsa-miR-101-3p	1
CXADR	hsa-miR-98-5p	1
CXADR	hsa-miR-24-3p	1
CXADR	hsa-miR-26a-5p	1
CXADR	hsa-miR-30a-3p	1
CXADR	hsa-let-7f-5p	1
CXADR	hsa-miR-27a-3p	1
CXADR	hsa-miR-26b-5p	1
CXADR	hsa-miR-32-5p	1
CXADR	hsa-miR-92a-3p	1
CXADR	hsa-miR-30a-5p	1
CXADR	hsa-miR-33a-5p	1
CXADR	hsa-miR-25-3p	1
CXADR	hsa-let-7a-5p	1
CXADR	hsa-miR-96-5p	1
LGR5	hsa-miR-22-3p	1
LGR5	hsa-miR-101-3p	1
LGR5	hsa-miR-33a-5p	1
FUT6	hsa-miR-16-5p	1
DSP	hsa-miR-20a-5p	1
DSP	hsa-miR-106a-5p	1
DSP	hsa-miR-93-5p	1
DSP	hsa-miR-17-5p	1
DSP	hsa-miR-27a-3p	1
DSP	hsa-miR-30a-5p	1
FOXQ1	hsa-miR-31-5p	1
FOXQ1	hsa-miR-96-5p	1
PKMYT1	hsa-miR-20a-5p	1
PKMYT1	hsa-miR-106a-5p	1
PKMYT1	hsa-miR-93-5p	1
PKMYT1	hsa-miR-24-3p	1
PKMYT1	hsa-miR-17-5p	1
CENPF	hsa-miR-20a-5p	1
CENPF	hsa-miR-28-5p	1
CENPF	hsa-miR-106a-5p	1
CENPF	hsa-miR-93-5p	1
CENPF	hsa-miR-17-5p	1
CENPF	hsa-miR-33a-5p	1
ELF3	hsa-miR-24-3p	1
CDCA5	hsa-miR-20a-5p	1
CDCA5	hsa-miR-103a-3p	1
CDCA5	hsa-miR-107	1
CDCA5	hsa-miR-27a-3p	1
CDCA5	hsa-miR-31-5p	1
CDCA8	hsa-miR-98-5p	1
CDCA8	hsa-let-7b-5p	1
CDCA8	hsa-let-7d-5p	1
CDCA8	hsa-let-7f-5p	1
CDCA8	hsa-let-7e-5p	1
CDCA8	hsa-let-7c-5p	1
CDCA8	hsa-miR-31-5p	1
CDCA8	hsa-miR-30a-5p	1
CDCA8	hsa-let-7a-5p	1
CDCA8	hsa-miR-24-1-5p	1
CDKN3	hsa-miR-26a-5p	1
CDKN3	hsa-miR-26b-5p	1
HOXB8	hsa-miR-26a-5p	1
HOXB8	hsa-miR-27a-3p	1
HOXB8	hsa-miR-26b-5p	1
HOXB8	hsa-miR-32-5p	1
HOXB8	hsa-miR-92a-3p	1
HOXB8	hsa-miR-30a-5p	1
HOXB8	hsa-miR-25-3p	1
C12orf75	hsa-miR-20a-5p	1
C12orf75	hsa-miR-23a-3p	1
C12orf75	hsa-miR-106a-5p	1
C12orf75	hsa-miR-93-5p	1
C12orf75	hsa-miR-16-5p	1
C12orf75	hsa-miR-17-5p	1
C12orf75	hsa-let-7e-5p	1
C12orf75	hsa-miR-15a-5p	1
GRB7	hsa-miR-103a-3p	1
GRB7	hsa-miR-107	1
GRB7	hsa-miR-16-5p	1
GRB7	hsa-miR-29a-3p	1
GRB7	hsa-miR-15a-5p	1
KIAA1324	hsa-miR-20a-5p	1
KIAA1324	hsa-miR-106a-5p	1
KIAA1324	hsa-miR-93-5p	1
KIAA1324	hsa-miR-17-5p	1
KIAA1324	hsa-miR-31-5p	1
KIAA1324	hsa-miR-96-5p	1
AURKB	hsa-miR-98-5p	1
AURKB	hsa-let-7b-5p	1
AURKB	hsa-let-7d-5p	1
AURKB	hsa-let-7f-5p	1
AURKB	hsa-let-7e-5p	1
AURKB	hsa-let-7c-5p	1
AURKB	hsa-let-7a-5p	1
UHRF1	hsa-miR-101-3p	1
UHRF1	hsa-miR-98-5p	1
UHRF1	hsa-let-7b-5p	1
UHRF1	hsa-let-7d-5p	1
UHRF1	hsa-let-7f-5p	1
UHRF1	hsa-let-7e-5p	1
UHRF1	hsa-let-7c-5p	1
UHRF1	hsa-let-7a-5p	1
UGT8	hsa-miR-103a-3p	1
UGT8	hsa-miR-107	1
UGT8	hsa-miR-29b-3p	1
UGT8	hsa-miR-30a-5p	1
UGT8	hsa-miR-33a-5p	1
LMNB1	hsa-miR-20a-5p	1
LMNB1	hsa-miR-23a-3p	1
LMNB1	hsa-miR-28-5p	1
LMNB1	hsa-miR-106a-5p	1
LMNB1	hsa-miR-93-5p	1
LMNB1	hsa-miR-98-5p	1
LMNB1	hsa-miR-101-3p	1
LMNB1	hsa-miR-24-3p	1
LMNB1	hsa-let-7b-5p	1
LMNB1	hsa-let-7d-5p	1
LMNB1	hsa-miR-17-5p	1
LMNB1	hsa-miR-29a-3p	1
LMNB1	hsa-let-7f-5p	1
LMNB1	hsa-let-7e-5p	1
LMNB1	hsa-miR-29b-3p	1
LMNB1	hsa-miR-27a-3p	1
LMNB1	hsa-let-7c-5p	1
LMNB1	hsa-miR-32-5p	1
LMNB1	hsa-miR-92a-3p	1
LMNB1	hsa-miR-25-3p	1
LMNB1	hsa-let-7a-5p	1
LMNB1	hsa-miR-21-5p	1
FOXM1	hsa-miR-21-5p	1
CXCL10	hsa-miR-16-5p	1
CXCL10	hsa-miR-15a-5p	1
SLC27A2	hsa-miR-93-5p	1
MELK	hsa-miR-23a-3p	1
MELK	hsa-miR-101-3p	1
MELK	hsa-miR-32-5p	1
MELK	hsa-miR-21-5p	1
EFNA3	hsa-miR-106a-5p	1
EFNA3	hsa-miR-107	1
EFNA3	hsa-miR-93-5p	1
EFNA3	hsa-miR-98-5p	1
EFNA3	hsa-miR-24-3p	1
EFNA3	hsa-let-7b-5p	1
EFNA3	hsa-miR-16-5p	1
EFNA3	hsa-miR-17-5p	1
EFNA3	hsa-miR-15a-5p	1
EFNA3	hsa-miR-27a-3p	1
EFNA3	hsa-let-7c-5p	1
EFNA3	hsa-miR-30a-5p	1
EFNA3	hsa-let-7a-5p	1
MYB	hsa-miR-103a-3p	1
MYB	hsa-miR-107	1
MYB	hsa-miR-101-3p	1
MYB	hsa-let-7b-5p	1
MYB	hsa-miR-16-5p	1
MYB	hsa-let-7f-5p	1
MYB	hsa-miR-15a-5p	1
MYB	hsa-let-7e-5p	1
MYB	hsa-miR-27a-3p	1
MYB	hsa-miR-31-5p	1
MYB	hsa-let-7c-5p	1
MYB	hsa-miR-32-5p	1
MYB	hsa-miR-92a-3p	1
MYB	hsa-miR-33a-5p	1
MYB	hsa-miR-25-3p	1
MYB	hsa-let-7a-5p	1
MYB	hsa-miR-96-5p	1
HN1	hsa-miR-20a-5p	1
HN1	hsa-miR-103a-3p	1
HN1	hsa-miR-106a-5p	1
HN1	hsa-miR-93-5p	1
HN1	hsa-miR-101-3p	1
HN1	hsa-miR-17-5p	1
HN1	hsa-miR-29a-3p	1
HN1	hsa-miR-29b-3p	1
SKA3	hsa-miR-27a-3p	1
BUB1	hsa-miR-20a-5p	1
BUB1	hsa-miR-106a-5p	1
BUB1	hsa-miR-93-5p	1
BUB1	hsa-miR-26a-5p	1
BUB1	hsa-miR-17-5p	1
BUB1	hsa-miR-26b-5p	1
BUB1	hsa-miR-30a-5p	1
PBK	hsa-miR-20a-5p	1
PBK	hsa-miR-106a-5p	1
PBK	hsa-miR-93-5p	1
PBK	hsa-miR-17-5p	1
PBK	hsa-miR-18a-5p	1
GRIN2D	hsa-miR-27a-3p	1
GMDS	hsa-miR-20a-5p	1
GMDS	hsa-miR-106a-5p	1
GMDS	hsa-miR-93-5p	1
GMDS	hsa-miR-26a-5p	1
GMDS	hsa-miR-17-5p	1
GMDS	hsa-miR-27a-3p	1
GMDS	hsa-miR-26b-5p	1
HMMR	hsa-miR-23a-3p	1
HMMR	hsa-miR-17-5p	1
HMMR	hsa-miR-31-5p	1
HMMR	hsa-miR-96-5p	1
HMMR	hsa-miR-21-5p	1
MACC1	hsa-miR-18a-5p	1
CENPA	hsa-miR-28-5p	1
CENPA	hsa-let-7b-5p	1
CENPA	hsa-let-7d-5p	1
CENPA	hsa-let-7c-5p	1
CENPA	hsa-let-7a-5p	1
ACSL5	hsa-miR-26a-5p	1
ACSL5	hsa-miR-26b-5p	1
PSAT1	hsa-miR-20a-5p	1
PSAT1	hsa-miR-106a-5p	1
PSAT1	hsa-miR-93-5p	1
PSAT1	hsa-let-7d-5p	1
PSAT1	hsa-miR-16-5p	1
PSAT1	hsa-miR-15a-5p	1
PSAT1	hsa-miR-30a-5p	1
PSAT1	hsa-miR-96-5p	1
PSAT1	hsa-miR-18a-5p	1
PHLDA2	hsa-miR-98-5p	1
DLGAP5	hsa-let-7d-5p	1
DLGAP5	hsa-miR-27a-3p	1
DLGAP5	hsa-miR-101-3p	1
DLGAP5	hsa-miR-33a-5p	1
PITX2	hsa-miR-23a-3p	1
PITX2	hsa-miR-30a-3p	1
PITX2	hsa-miR-30a-5p	1
PITX2	hsa-miR-21-5p	1
LMO7	hsa-miR-16-5p	1
LMO7	hsa-miR-15a-5p	1
LMO7	hsa-miR-31-5p	1
HMGB3	hsa-miR-20a-5p	1
HMGB3	hsa-miR-28-5p	1
HMGB3	hsa-miR-103a-3p	1
HMGB3	hsa-miR-106a-5p	1
HMGB3	hsa-miR-107	1
HMGB3	hsa-miR-93-5p	1
HMGB3	hsa-miR-26a-5p	1
HMGB3	hsa-miR-17-5p	1
HMGB3	hsa-miR-27a-3p	1
HMGB3	hsa-miR-18a-5p	1
MARCKSL1	hsa-miR-23a-3p	1
MARCKSL1	hsa-miR-101-3p	1
MARCKSL1	hsa-miR-98-5p	1
MARCKSL1	hsa-miR-24-3p	1
MARCKSL1	hsa-let-7b-5p	1
MARCKSL1	hsa-let-7d-5p	1
MARCKSL1	hsa-let-7f-5p	1
MARCKSL1	hsa-let-7e-5p	1
MARCKSL1	hsa-miR-27a-3p	1
MARCKSL1	hsa-let-7c-5p	1
MARCKSL1	hsa-miR-30a-5p	1
MARCKSL1	hsa-let-7a-5p	1
ANLN	hsa-miR-16-5p	1
ANLN	hsa-miR-15a-5p	1
ANLN	hsa-miR-31-5p	1
ANLN	hsa-miR-25-3p	1
ANLN	hsa-miR-96-5p	1
ANLN	hsa-miR-18a-5p	1
PLK1	hsa-miR-23a-3p	1
PLK1	hsa-miR-101-3p	1
PLK1	hsa-miR-25-3p	1
LY75	hsa-miR-19b-3p	1
LY75	hsa-miR-19a-3p	1
CDCP1	hsa-miR-19b-3p	1
CDCP1	hsa-miR-107	1
CDCP1	hsa-miR-93-5p	1
CDCP1	hsa-miR-24-3p	1
CDCP1	hsa-let-7d-5p	1
CDCP1	hsa-miR-30a-3p	1
CDCP1	hsa-miR-92a-3p	1
CDCP1	hsa-miR-19a-3p	1
RHPN2	hsa-miR-101-3p	1
RHPN2	hsa-let-7d-5p	1
RHPN2	hsa-miR-16-5p	1
RHPN2	hsa-miR-29a-3p	1
RHPN2	hsa-let-7e-5p	1
RHPN2	hsa-miR-15a-5p	1
RHPN2	hsa-miR-29b-3p	1
RHPN2	hsa-miR-32-5p	1
RHPN2	hsa-miR-92a-3p	1
RHPN2	hsa-miR-31-5p	1
RHPN2	hsa-miR-25-3p	1
RHPN2	hsa-miR-96-5p	1
CTHRC1	hsa-miR-30a-5p	1
TRIP13	hsa-miR-23a-3p	1
TRIP13	hsa-miR-106a-5p	1
TRIP13	hsa-miR-29a-3p	1
TRIP13	hsa-miR-29b-3p	1
TRIP13	hsa-miR-32-5p	1
TRIP13	hsa-miR-92a-3p	1
TRIP13	hsa-miR-25-3p	1
PRR11	hsa-miR-20a-5p	1
PRR11	hsa-miR-15a-5p	1
PRR11	hsa-miR-32-5p	1
PRR11	hsa-miR-92a-3p	1
PRR11	hsa-miR-25-3p	1
PRR11	hsa-miR-21-5p	1
SORD	hsa-miR-20a-5p	1
SORD	hsa-miR-106a-5p	1
ENC1	hsa-miR-20a-5p	1
ENC1	hsa-miR-23a-3p	1
ENC1	hsa-miR-19b-3p	1
ENC1	hsa-miR-93-5p	1
ENC1	hsa-miR-26a-5p	1
ENC1	hsa-let-7b-5p	1
ENC1	hsa-miR-16-5p	1
ENC1	hsa-miR-15a-5p	1
ENC1	hsa-miR-27a-3p	1
ENC1	hsa-miR-26b-5p	1
ENC1	hsa-miR-31-5p	1
ENC1	hsa-miR-19a-3p	1
ENC1	hsa-miR-33a-5p	1
ENC1	hsa-miR-96-5p	1
ENC1	hsa-miR-18a-5p	1
TNFRSF12A	hsa-miR-19b-3p	1
TNFRSF12A	hsa-let-7f-5p	1
TNFRSF12A	hsa-miR-19a-3p	1
TOX3	hsa-miR-23a-3p	1
TOX3	hsa-miR-101-3p	1
GINS1	hsa-miR-20a-5p	1
GINS1	hsa-miR-23a-3p	1
GINS1	hsa-miR-28-5p	1
GINS1	hsa-miR-106a-5p	1
GINS1	hsa-miR-93-5p	1
GINS1	hsa-miR-98-5p	1
GINS1	hsa-miR-16-5p	1
GINS1	hsa-miR-17-5p	1
GINS1	hsa-miR-19b-3p	1
GINS1	hsa-miR-29a-3p	1
GINS1	hsa-let-7e-5p	1
GINS1	hsa-miR-29b-3p	1
GINS1	hsa-miR-27a-3p	1
GINS1	hsa-miR-31-5p	1
GINS1	hsa-miR-19a-3p	1
GINS1	hsa-miR-21-5p	1
SCD	hsa-miR-22-3p	1
SCD	hsa-miR-28-5p	1
SCD	hsa-miR-103a-3p	1
SCD	hsa-miR-107	1
SCD	hsa-miR-98-5p	1
SCD	hsa-miR-24-3p	1
SCD	hsa-let-7b-5p	1
SCD	hsa-let-7d-5p	1
SCD	hsa-let-7f-5p	1
SCD	hsa-miR-15a-5p	1
SCD	hsa-let-7e-5p	1
SCD	hsa-miR-27a-3p	1
SCD	hsa-let-7c-5p	1
SCD	hsa-miR-17-3p	1
SCD	hsa-miR-92a-3p	1
SCD	hsa-miR-25-3p	1
SCD	hsa-let-7a-5p	1
SCD	hsa-miR-24-1-5p	1
SCD	hsa-miR-95-3p	1
KIF2C	hsa-miR-20a-5p	1
KIF2C	hsa-miR-93-5p	1
KIF2C	hsa-miR-16-5p	1
KIF2C	hsa-miR-15a-5p	1
KIF2C	hsa-let-7e-5p	1
KIF2C	hsa-miR-30a-5p	1
KIF2C	hsa-miR-18a-5p	1
NUSAP1	hsa-miR-22-3p	1
NUSAP1	hsa-miR-21-5p	1
LIPH	hsa-miR-98-5p	1
LIPH	hsa-let-7b-5p	1
LIPH	hsa-let-7d-5p	1
LIPH	hsa-let-7f-5p	1
LIPH	hsa-let-7e-5p	1
LIPH	hsa-let-7c-5p	1
LIPH	hsa-miR-32-5p	1
LIPH	hsa-miR-92a-3p	1
LIPH	hsa-miR-25-3p	1
LIPH	hsa-let-7a-5p	1
WWC1	hsa-miR-103a-3p	1
WWC1	hsa-miR-107	1
WWC1	hsa-miR-16-5p	1
WWC1	hsa-miR-15a-5p	1
WWC1	hsa-miR-27a-3p	1
KIF11	hsa-miR-20a-5p	1
KIF11	hsa-miR-23a-3p	1
KIF11	hsa-miR-106a-5p	1
KIF11	hsa-miR-93-5p	1
KIF11	hsa-miR-101-3p	1
KIF11	hsa-miR-98-5p	1
KIF11	hsa-let-7b-5p	1
KIF11	hsa-let-7d-5p	1
KIF11	hsa-miR-17-5p	1
KIF11	hsa-let-7f-5p	1
KIF11	hsa-let-7c-5p	1
KIF11	hsa-miR-32-5p	1
KIF11	hsa-miR-92a-3p	1
KIF11	hsa-miR-30a-5p	1
KIF11	hsa-miR-25-3p	1
KIF11	hsa-let-7a-5p	1
KIF11	hsa-miR-18a-5p	1
MCM2	hsa-miR-23a-3p	1
MCM2	hsa-miR-29b-3p	1
MCM2	hsa-miR-31-5p	1
MCM2	hsa-miR-30a-5p	1
MCM2	hsa-miR-18a-5p	1
C6orf222	hsa-miR-21-5p	1
CENPM	hsa-miR-16-5p	1
GALNT4	hsa-miR-20a-5p	1
GALNT4	hsa-miR-106a-5p	1
GALNT4	hsa-miR-93-5p	1
GALNT4	hsa-miR-98-5p	1
GALNT4	hsa-let-7b-5p	1
GALNT4	hsa-let-7d-5p	1
GALNT4	hsa-miR-16-5p	1
GALNT4	hsa-miR-17-5p	1
GALNT4	hsa-miR-29a-3p	1
GALNT4	hsa-let-7f-5p	1
GALNT4	hsa-miR-15a-5p	1
GALNT4	hsa-let-7e-5p	1
GALNT4	hsa-miR-29b-3p	1
GALNT4	hsa-let-7c-5p	1
GALNT4	hsa-miR-32-5p	1
GALNT4	hsa-miR-92a-3p	1
GALNT4	hsa-miR-30a-5p	1
GALNT4	hsa-miR-25-3p	1
GALNT4	hsa-let-7a-5p	1
MARVELD2	hsa-miR-103a-3p	1
MARVELD2	hsa-miR-107	1
MARVELD2	hsa-miR-27a-3p	1
MARVELD2	hsa-miR-30a-5p	1
MARVELD2	hsa-miR-21-5p	1
TCF7	hsa-miR-15a-5p	1
TCF7	hsa-miR-31-5p	1
TCF7	hsa-miR-30a-5p	1
BRI3BP	hsa-miR-22-3p	1
BRI3BP	hsa-let-7d-5p	1
SLC7A5	hsa-miR-26a-5p	1
SLC7A5	hsa-miR-15a-5p	1
SLC7A5	hsa-miR-31-5p	1
SLC7A5	hsa-miR-26b-5p	1
SLC7A5	hsa-miR-30a-5p	1
SLC7A5	hsa-miR-24-1-5p	1
MAPK13	hsa-miR-27a-3p	1
KIF4A	hsa-miR-107	1
CDS1	hsa-miR-26a-5p	1
CDS1	hsa-let-7d-5p	1
CDS1	hsa-miR-19b-3p	1
CDS1	hsa-miR-27a-3p	1
CDS1	hsa-miR-26b-5p	1
CDS1	hsa-miR-32-5p	1
CDS1	hsa-miR-30a-5p	1
CDS1	hsa-miR-19a-3p	1
UBE2T	hsa-miR-98-5p	1
UBE2T	hsa-let-7b-5p	1
UBE2T	hsa-let-7d-5p	1
UBE2T	hsa-let-7f-5p	1
UBE2T	hsa-let-7e-5p	1
UBE2T	hsa-let-7c-5p	1
UBE2T	hsa-let-7a-5p	1
UBE2T	hsa-miR-96-5p	1
FA2H	hsa-miR-26a-5p	1
FA2H	hsa-miR-26b-5p	1
FA2H	hsa-miR-32-5p	1
SQLE	hsa-miR-20a-5p	1
SQLE	hsa-miR-23a-3p	1
SQLE	hsa-miR-106a-5p	1
SQLE	hsa-miR-93-5p	1
SQLE	hsa-miR-17-5p	1
SQLE	hsa-miR-19b-3p	1
SQLE	hsa-miR-32-5p	1
SQLE	hsa-miR-92a-3p	1
SQLE	hsa-miR-19a-3p	1
SQLE	hsa-miR-25-3p	1
SQLE	hsa-miR-21-5p	1
SLC2A1	hsa-miR-22-3p	1
SLC2A1	hsa-miR-23a-3p	1
SLC2A1	hsa-miR-28-5p	1
SLC2A1	hsa-miR-19b-3p	1
SLC2A1	hsa-miR-19a-3p	1
ECT2	hsa-miR-22-3p	1
ECT2	hsa-miR-19b-3p	1
ECT2	hsa-miR-27a-3p	1
ECT2	hsa-miR-19a-3p	1
ECT2	hsa-miR-33a-5p	1
ECT2	hsa-miR-96-5p	1
BAIAP2L1	hsa-let-7e-5p	1
TGFBI	hsa-miR-20a-5p	1
TGFBI	hsa-miR-22-3p	1
TGFBI	hsa-miR-106a-5p	1
TGFBI	hsa-miR-93-5p	1
TGFBI	hsa-miR-17-5p	1
TGFBI	hsa-miR-19b-3p	1
TGFBI	hsa-miR-27a-3p	1
TGFBI	hsa-miR-30a-5p	1
TGFBI	hsa-miR-19a-3p	1
TGFBI	hsa-miR-21-5p	1
NR1I2	hsa-miR-98-5p	1
NR1I2	hsa-let-7b-5p	1
NR1I2	hsa-let-7d-5p	1
NR1I2	hsa-let-7f-5p	1
NR1I2	hsa-let-7e-5p	1
NR1I2	hsa-let-7c-5p	1
NR1I2	hsa-let-7a-5p	1
NR1I2	hsa-miR-18a-5p	1
DEPDC1B	hsa-miR-103a-3p	1
DEPDC1B	hsa-miR-107	1
DEPDC1B	hsa-miR-101-3p	1
DEPDC1B	hsa-miR-26a-5p	1
DEPDC1B	hsa-miR-15a-5p	1
DEPDC1B	hsa-miR-27a-3p	1
DEPDC1B	hsa-miR-26b-5p	1
DEPDC1B	hsa-miR-30a-5p	1
DEPDC1B	hsa-miR-33a-5p	1
DEPDC1B	hsa-miR-96-5p	1
GALNT5	hsa-miR-101-3p	1
GALNT5	hsa-miR-27a-3p	1
NQO1	hsa-miR-106a-5p	1
NQO1	hsa-miR-22-3p	1
VDR	hsa-miR-24-3p	1
VDR	hsa-miR-16-5p	1
VDR	hsa-miR-15a-5p	1
CENPN	hsa-miR-22-3p	1
CENPN	hsa-miR-24-3p	1
CENPN	hsa-miR-33a-5p	1
NCAPG	hsa-miR-23a-3p	1
NCAPG	hsa-miR-15a-5p	1
NCAPG	hsa-miR-27a-3p	1
SLC12A2	hsa-miR-23a-3p	1
SLC12A2	hsa-miR-103a-3p	1
SLC12A2	hsa-miR-107	1
SLC12A2	hsa-miR-98-5p	1
SLC12A2	hsa-miR-101-3p	1
SLC12A2	hsa-miR-26a-5p	1
SLC12A2	hsa-let-7b-5p	1
SLC12A2	hsa-miR-16-5p	1
SLC12A2	hsa-miR-19b-3p	1
SLC12A2	hsa-let-7f-5p	1
SLC12A2	hsa-miR-15a-5p	1
SLC12A2	hsa-miR-29b-3p	1
SLC12A2	hsa-miR-26b-5p	1
SLC12A2	hsa-miR-27a-3p	1
SLC12A2	hsa-miR-32-5p	1
SLC12A2	hsa-miR-92a-3p	1
SLC12A2	hsa-miR-19a-3p	1
SLC12A2	hsa-miR-33a-5p	1
SLC12A2	hsa-miR-25-3p	1
SLC12A2	hsa-let-7a-5p	1
MET	hsa-miR-20a-5p	1
MET	hsa-miR-23a-3p	1
MET	hsa-miR-15a-5p	1
MET	hsa-miR-26b-5p	1
MET	hsa-miR-27a-3p	1
MET	hsa-miR-31-5p	1
MET	hsa-miR-101-3p	1
MET	hsa-miR-30a-5p	1
MET	hsa-miR-25-3p	1
MET	hsa-miR-18a-5p	1
OCIAD2	hsa-miR-27a-3p	1
RAD51	hsa-miR-26a-5p	1
RAD51	hsa-miR-16-5p	1
RAD51	hsa-miR-15a-5p	1
RAD51	hsa-miR-26b-5p	1
RAD51	hsa-miR-96-5p	1
TTK	hsa-miR-26a-5p	1
TTK	hsa-miR-26b-5p	1
CENPW	hsa-miR-30a-5p	1
JUP	hsa-miR-16-5p	1
JUP	hsa-miR-15a-5p	1
NUF2	hsa-miR-22-3p	1
NUF2	hsa-miR-31-5p	1
KIAA0226L	hsa-miR-30a-5p	1
CCNO	hsa-miR-20a-5p	1
CCNO	hsa-miR-92a-3p	1
CCNO	hsa-miR-25-3p	1
PIGY	hsa-miR-103a-3p	1
PIGY	hsa-miR-107	1
PIGY	hsa-let-7d-5p	1
PIGY	hsa-miR-17-5p	1
PIGY	hsa-miR-27a-3p	1
PIGY	hsa-miR-31-5p	1
KCNN4	hsa-miR-103a-3p	1
KCNN4	hsa-miR-107	1
KCNN4	hsa-miR-16-5p	1
KCNN4	hsa-miR-29a-3p	1
KCNN4	hsa-miR-15a-5p	1
KCNN4	hsa-miR-29b-3p	1
HJURP	hsa-miR-27a-3p	1
IQGAP3	hsa-miR-101-3p	1
IQGAP3	hsa-miR-16-5p	1
IQGAP3	hsa-let-7f-5p	1
IQGAP3	hsa-miR-15a-5p	1
IQGAP3	hsa-let-7e-5p	1
IQGAP3	hsa-let-7c-5p	1
OVOL2	hsa-miR-26a-5p	1
OVOL2	hsa-miR-29a-3p	1
OVOL2	hsa-miR-29b-3p	1
OVOL2	hsa-miR-30a-5p	1
PRSS16	hsa-miR-23a-3p	1
PRSS16	hsa-miR-17-5p	1
DTL	hsa-miR-20a-5p	1
DTL	hsa-miR-23a-3p	1
DTL	hsa-miR-106a-5p	1
DTL	hsa-miR-93-5p	1
DTL	hsa-miR-98-5p	1
DTL	hsa-miR-24-3p	1
DTL	hsa-let-7b-5p	1
DTL	hsa-miR-17-5p	1
DTL	hsa-miR-30a-3p	1
DTL	hsa-miR-26b-5p	1
DTL	hsa-miR-31-5p	1
DTL	hsa-let-7c-5p	1
DTL	hsa-miR-32-5p	1
DTL	hsa-miR-92a-3p	1
DTL	hsa-miR-25-3p	1
DTL	hsa-miR-96-5p	1
DTL	hsa-miR-18a-5p	1
MND1	hsa-miR-101-3p	1
HNF1B	hsa-miR-24-3p	1
HNF1B	hsa-miR-101-3p	1
HNF1B	hsa-miR-32-5p	1
HNF1B	hsa-miR-92a-3p	1
HNF1B	hsa-miR-25-3p	1
MCM4	hsa-miR-23a-3p	1
MCM4	hsa-miR-24-3p	1
MCM4	hsa-miR-27a-3p	1
MCM4	hsa-miR-21-5p	1
MCM4	hsa-miR-96-5p	1
BUB1B	hsa-miR-101-3p	1
HNF4G	hsa-miR-30a-5p	1
PVRL4	hsa-miR-103a-3p	1
PVRL4	hsa-miR-107	1
PVRL4	hsa-miR-32-5p	1
CCNA2	hsa-miR-22-3p	1
CCNA2	hsa-miR-19b-3p	1
CCNA2	hsa-miR-29a-3p	1
CCNA2	hsa-miR-29b-3p	1
CCNA2	hsa-miR-27a-3p	1
CCNA2	hsa-miR-19a-3p	1
ARHGAP8	hsa-miR-98-5p	1
ARHGAP8	hsa-let-7b-5p	1
ARHGAP8	hsa-let-7d-5p	1
ARHGAP8	hsa-let-7f-5p	1
ARHGAP8	hsa-let-7e-5p	1
ARHGAP8	hsa-let-7c-5p	1
ARHGAP8	hsa-let-7a-5p	1
C2CD4A	hsa-miR-20a-5p	1
C2CD4A	hsa-miR-106a-5p	1
C2CD4A	hsa-miR-93-5p	1
C2CD4A	hsa-miR-98-5p	1
C2CD4A	hsa-let-7b-5p	1
C2CD4A	hsa-let-7d-5p	1
C2CD4A	hsa-miR-17-5p	1
C2CD4A	hsa-let-7f-5p	1
C2CD4A	hsa-let-7e-5p	1
C2CD4A	hsa-let-7c-5p	1
C2CD4A	hsa-let-7a-5p	1
RAB11FIP4	hsa-miR-20a-5p	1
RAB11FIP4	hsa-miR-106a-5p	1
RAB11FIP4	hsa-miR-93-5p	1
RAB11FIP4	hsa-miR-98-5p	1
RAB11FIP4	hsa-let-7b-5p	1
RAB11FIP4	hsa-let-7d-5p	1
RAB11FIP4	hsa-miR-17-5p	1
RAB11FIP4	hsa-let-7f-5p	1
RAB11FIP4	hsa-let-7e-5p	1
RAB11FIP4	hsa-let-7c-5p	1
RAB11FIP4	hsa-let-7a-5p	1
SEL1L3	hsa-miR-103a-3p	1
SEL1L3	hsa-miR-19b-3p	1
SEL1L3	hsa-miR-107	1
SEL1L3	hsa-miR-16-5p	1
SEL1L3	hsa-miR-15a-5p	1
SEL1L3	hsa-miR-17-3p	1
SEL1L3	hsa-miR-32-5p	1
SEL1L3	hsa-miR-92a-3p	1
SEL1L3	hsa-miR-30a-5p	1
SEL1L3	hsa-miR-19a-3p	1
SEL1L3	hsa-miR-33a-5p	1
SEL1L3	hsa-miR-25-3p	1
SEL1L3	hsa-miR-18a-5p	1
CAPG	hsa-miR-16-5p	1
EXO1	hsa-miR-103a-3p	1
EXO1	hsa-miR-107	1
EXO1	hsa-miR-24-3p	1
EXO1	hsa-miR-96-5p	1
NDFIP2	hsa-miR-22-3p	1
NDFIP2	hsa-miR-23a-3p	1
NDFIP2	hsa-miR-26a-5p	1
NDFIP2	hsa-let-7b-5p	1
NDFIP2	hsa-let-7d-5p	1
NDFIP2	hsa-miR-19b-3p	1
NDFIP2	hsa-let-7f-5p	1
NDFIP2	hsa-let-7e-5p	1
NDFIP2	hsa-let-7c-5p	1
NDFIP2	hsa-miR-98-5p	1
NDFIP2	hsa-miR-19a-3p	1
NDFIP2	hsa-let-7a-5p	1
NDFIP2	hsa-miR-21-5p	1
NME2	hsa-miR-96-5p	1
PAQR4	hsa-miR-106a-5p	1
PAQR4	hsa-miR-93-5p	1
PHLDA1	hsa-miR-23a-3p	1
PHLDA1	hsa-miR-103a-3p	1
PHLDA1	hsa-miR-107	1
PHLDA1	hsa-miR-101-3p	1
PHLDA1	hsa-miR-32-5p	1
PHLDA1	hsa-miR-92a-3p	1
PHLDA1	hsa-miR-25-3p	1
ESRP2	hsa-miR-24-3p	1
ESRP2	hsa-miR-19b-3p	1
ESRP2	hsa-miR-19a-3p	1
OIP5	hsa-miR-20a-5p	1
OIP5	hsa-miR-103a-3p	1
OIP5	hsa-miR-106a-5p	1
OIP5	hsa-miR-107	1
OIP5	hsa-miR-93-5p	1
OIP5	hsa-miR-16-5p	1
OIP5	hsa-miR-17-5p	1
OIP5	hsa-miR-15a-5p	1
OIP5	hsa-miR-29b-3p	1
CDCA3	hsa-miR-33a-5p	1
KPNA2	hsa-miR-20a-5p	1
KPNA2	hsa-miR-23a-3p	1
KPNA2	hsa-miR-106a-5p	1
KPNA2	hsa-miR-93-5p	1
KPNA2	hsa-miR-26a-5p	1
KPNA2	hsa-miR-17-5p	1
KPNA2	hsa-miR-26b-5p	1
KPNA2	hsa-miR-21-5p	1
FAM111B	hsa-miR-23a-3p	1
FAM111B	hsa-miR-96-5p	1
RAD51AP1	hsa-miR-23a-3p	1
RAD51AP1	hsa-miR-103a-3p	1
RAD51AP1	hsa-miR-107	1
RAD51AP1	hsa-miR-26a-5p	1
RAD51AP1	hsa-miR-26b-5p	1
RAD51AP1	hsa-miR-21-5p	1
RAD51AP1	hsa-miR-18a-5p	1
RBM47	hsa-miR-23a-3p	1
RBM47	hsa-miR-106a-5p	1
RBM47	hsa-miR-101-3p	1
RBM47	hsa-miR-26a-5p	1
RBM47	hsa-miR-26b-5p	1
RBM47	hsa-miR-32-5p	1
RBM47	hsa-miR-92a-3p	1
RBM47	hsa-miR-19a-3p	1
RBM47	hsa-miR-25-3p	1
EREG	hsa-miR-20a-5p	1
EREG	hsa-miR-28-5p	1
EREG	hsa-miR-106a-5p	1
EREG	hsa-miR-93-5p	1
EREG	hsa-miR-26a-5p	1
EREG	hsa-miR-17-5p	1
EREG	hsa-miR-19b-3p	1
EREG	hsa-miR-26b-5p	1
EREG	hsa-miR-19a-3p	1
EREG	hsa-miR-33a-5p	1
EREG	hsa-miR-18a-5p	1
CXCL16	hsa-miR-24-3p	1
CXCL16	hsa-miR-27a-3p	1
AXIN2	hsa-miR-103a-3p	1
AXIN2	hsa-miR-107	1
AXIN2	hsa-miR-101-3p	1
AXIN2	hsa-miR-26a-5p	1
AXIN2	hsa-miR-16-5p	1
AXIN2	hsa-miR-30a-3p	1
AXIN2	hsa-miR-15a-5p	1
AXIN2	hsa-miR-27a-3p	1
AXIN2	hsa-miR-26b-5p	1
AXIN2	hsa-miR-32-5p	1
AXIN2	hsa-miR-18a-5p	1
GALE	hsa-miR-98-5p	1
GALE	hsa-let-7b-5p	1
GALE	hsa-let-7d-5p	1
GALE	hsa-let-7f-5p	1
GALE	hsa-let-7e-5p	1
GALE	hsa-let-7c-5p	1
GALE	hsa-let-7a-5p	1
LEFTY1	hsa-miR-20a-5p	1
LEFTY1	hsa-miR-106a-5p	1
LEFTY1	hsa-let-7b-5p	1
LEFTY1	hsa-miR-17-5p	1
LEFTY1	hsa-let-7c-5p	1
HOOK1	hsa-miR-20a-5p	1
HOOK1	hsa-miR-106a-5p	1
HOOK1	hsa-miR-93-5p	1
HOOK1	hsa-miR-98-5p	1
HOOK1	hsa-miR-26a-5p	1
HOOK1	hsa-let-7b-5p	1
HOOK1	hsa-let-7d-5p	1
HOOK1	hsa-miR-16-5p	1
HOOK1	hsa-miR-17-5p	1
HOOK1	hsa-let-7f-5p	1
HOOK1	hsa-miR-15a-5p	1
HOOK1	hsa-let-7e-5p	1
HOOK1	hsa-miR-27a-3p	1
HOOK1	hsa-let-7c-5p	1
HOOK1	hsa-miR-26b-5p	1
HOOK1	hsa-miR-30a-5p	1
HOOK1	hsa-miR-19a-3p	1
HOOK1	hsa-let-7a-5p	1
GTSE1	hsa-miR-23a-3p	1
GTSE1	hsa-miR-17-3p	1
GTSE1	hsa-miR-92a-3p	1
GTSE1	hsa-miR-25-3p	1
GTSE1	hsa-miR-21-5p	1
ILDR1	hsa-miR-20a-5p	1
ILDR1	hsa-miR-106a-5p	1
ILDR1	hsa-miR-93-5p	1
ILDR1	hsa-miR-17-5p	1
ITGA2	hsa-miR-20a-5p	1
ITGA2	hsa-miR-23a-3p	1
ITGA2	hsa-miR-103a-3p	1
ITGA2	hsa-miR-19b-3p	1
ITGA2	hsa-miR-106a-5p	1
ITGA2	hsa-miR-107	1
ITGA2	hsa-miR-93-5p	1
ITGA2	hsa-miR-101-3p	1
ITGA2	hsa-miR-24-3p	1
ITGA2	hsa-miR-16-5p	1
ITGA2	hsa-miR-17-5p	1
ITGA2	hsa-miR-15a-5p	1
ITGA2	hsa-miR-27a-3p	1
ITGA2	hsa-miR-30a-5p	1
ITGA2	hsa-miR-19a-3p	1
ITGA2	hsa-miR-33a-5p	1
ITGA2	hsa-miR-21-5p	1
ITGA2	hsa-miR-18a-5p	1
SP6	hsa-miR-24-3p	1
SP6	hsa-miR-17-5p	1
SP6	hsa-miR-30a-3p	1
SP6	hsa-miR-27a-3p	1
DSC2	hsa-miR-23a-3p	1
DSC2	hsa-miR-103a-3p	1
DSC2	hsa-miR-107	1
DSC2	hsa-miR-24-3p	1
DSC2	hsa-miR-26a-5p	1
DSC2	hsa-miR-29a-3p	1
DSC2	hsa-miR-29b-3p	1
DSC2	hsa-miR-26b-5p	1
DSC2	hsa-miR-32-5p	1
DSC2	hsa-miR-92a-3p	1
DSC2	hsa-miR-25-3p	1
DSC2	hsa-miR-21-5p	1
TMEM97	hsa-miR-23a-3p	1
TMEM97	hsa-miR-101-3p	1
TMEM97	hsa-miR-16-5p	1
TMEM97	hsa-miR-17-3p	1
TMEM97	hsa-miR-92a-3p	1
TMEM97	hsa-miR-25-3p	1
TMEM141	hsa-miR-29a-3p	1
TMEM141	hsa-miR-29b-3p	1
TMEM141	hsa-miR-96-5p	1
CHEK1	hsa-miR-103a-3p	1
CHEK1	hsa-miR-107	1
CHEK1	hsa-miR-98-5p	1
CHEK1	hsa-let-7b-5p	1
CHEK1	hsa-let-7d-5p	1
CHEK1	hsa-miR-16-5p	1
CHEK1	hsa-let-7f-5p	1
CHEK1	hsa-miR-15a-5p	1
CHEK1	hsa-let-7e-5p	1
CHEK1	hsa-miR-27a-3p	1
CHEK1	hsa-let-7c-5p	1
CHEK1	hsa-let-7a-5p	1
SOX4	hsa-miR-20a-5p	1
SOX4	hsa-miR-28-5p	1
SOX4	hsa-miR-106a-5p	1
SOX4	hsa-miR-93-5p	1
SOX4	hsa-let-7d-5p	1
SOX4	hsa-miR-17-5p	1
SOX4	hsa-miR-19b-3p	1
SOX4	hsa-miR-29a-3p	1
SOX4	hsa-miR-29b-3p	1
SOX4	hsa-miR-101-3p	1
SOX4	hsa-miR-32-5p	1
SOX4	hsa-miR-92a-3p	1
SOX4	hsa-miR-30a-5p	1
SOX4	hsa-miR-19a-3p	1
SOX4	hsa-miR-25-3p	1
SOX4	hsa-miR-21-5p	1
RAB11FIP1	hsa-miR-20a-5p	1
RAB11FIP1	hsa-miR-106a-5p	1
RAB11FIP1	hsa-miR-93-5p	1
RAB11FIP1	hsa-miR-98-5p	1
RAB11FIP1	hsa-miR-24-3p	1
RAB11FIP1	hsa-miR-26a-5p	1
RAB11FIP1	hsa-let-7b-5p	1
RAB11FIP1	hsa-let-7d-5p	1
RAB11FIP1	hsa-miR-17-5p	1
RAB11FIP1	hsa-miR-29a-3p	1
RAB11FIP1	hsa-miR-30a-3p	1
RAB11FIP1	hsa-let-7f-5p	1
RAB11FIP1	hsa-let-7e-5p	1
RAB11FIP1	hsa-miR-29b-3p	1
RAB11FIP1	hsa-miR-26b-5p	1
RAB11FIP1	hsa-miR-27a-3p	1
RAB11FIP1	hsa-miR-101-3p	1
RAB11FIP1	hsa-let-7c-5p	1
RAB11FIP1	hsa-miR-32-5p	1
RAB11FIP1	hsa-miR-92a-3p	1
RAB11FIP1	hsa-miR-30a-5p	1
RAB11FIP1	hsa-miR-25-3p	1
RAB11FIP1	hsa-let-7a-5p	1
RAB11FIP1	hsa-miR-21-5p	1
GPR39	hsa-miR-19b-3p	1
GPR39	hsa-miR-27a-3p	1
GPR39	hsa-miR-30a-5p	1
GPR39	hsa-miR-19a-3p	1
GPR39	hsa-miR-96-5p	1
FOXA1	hsa-miR-20a-5p	1
FOXA1	hsa-miR-23a-3p	1
FOXA1	hsa-miR-106a-5p	1
FOXA1	hsa-miR-93-5p	1
FOXA1	hsa-miR-17-5p	1
FOXA1	hsa-miR-29b-3p	1
FOXA1	hsa-miR-30a-5p	1
ARHGAP11A	hsa-miR-101-3p	1
ARHGAP11A	hsa-miR-26a-5p	1
ARHGAP11A	hsa-let-7d-5p	1
ARHGAP11A	hsa-miR-19b-3p	1
ARHGAP11A	hsa-miR-26b-5p	1
ARHGAP11A	hsa-miR-31-5p	1
ARHGAP11A	hsa-miR-30a-5p	1
ARHGAP11A	hsa-miR-19a-3p	1
EPHX4	hsa-miR-23a-3p	1
EPHX4	hsa-miR-19b-3p	1
EPHX4	hsa-miR-19a-3p	1
SLC12A8	hsa-miR-29a-3p	1
SLC12A8	hsa-miR-29b-3p	1
CDC25A	hsa-miR-20a-5p	1
CDC25A	hsa-miR-103a-3p	1
CDC25A	hsa-miR-106a-5p	1
CDC25A	hsa-miR-107	1
CDC25A	hsa-miR-93-5p	1
CDC25A	hsa-miR-98-5p	1
CDC25A	hsa-miR-24-3p	1
CDC25A	hsa-let-7b-5p	1
CDC25A	hsa-let-7d-5p	1
CDC25A	hsa-miR-16-5p	1
CDC25A	hsa-miR-17-5p	1
CDC25A	hsa-let-7f-5p	1
CDC25A	hsa-let-7e-5p	1
CDC25A	hsa-miR-15a-5p	1
CDC25A	hsa-let-7c-5p	1
CDC25A	hsa-miR-92a-3p	1
CDC25A	hsa-miR-25-3p	1
CDC25A	hsa-let-7a-5p	1
CDC25A	hsa-miR-105-5p	1
CDC25A	hsa-miR-21-5p	1
NETO2	hsa-miR-20a-5p	1
NETO2	hsa-miR-106a-5p	1
NETO2	hsa-miR-93-5p	1
NETO2	hsa-miR-98-5p	1
NETO2	hsa-miR-101-3p	1
NETO2	hsa-let-7b-5p	1
NETO2	hsa-let-7d-5p	1
NETO2	hsa-miR-17-5p	1
NETO2	hsa-miR-27a-3p	1
NETO2	hsa-let-7c-5p	1
NETO2	hsa-miR-32-5p	1
NETO2	hsa-miR-96-5p	1
NETO2	hsa-miR-21-5p	1
CTSS	hsa-miR-20a-5p	1
CTSS	hsa-miR-106a-5p	1
CTSS	hsa-miR-93-5p	1
CTSS	hsa-miR-17-5p	1
EPSTI1	hsa-miR-103a-3p	1
EPSTI1	hsa-miR-107	1
EPSTI1	hsa-let-7b-5p	1
EPSTI1	hsa-let-7e-5p	1
PRC1	hsa-miR-23a-3p	1
PRC1	hsa-miR-101-3p	1
PRC1	hsa-miR-24-3p	1
PRC1	hsa-miR-19b-3p	1
PRC1	hsa-miR-30a-5p	1
PRC1	hsa-miR-19a-3p	1
SPTBN2	hsa-miR-103a-3p	1
SPTBN2	hsa-miR-107	1
SPTBN2	hsa-miR-16-5p	1
SPTBN2	hsa-miR-15a-5p	1
DHCR24	hsa-miR-22-3p	1
DHCR24	hsa-miR-103a-3p	1
DHCR24	hsa-miR-107	1
DHCR24	hsa-miR-26a-5p	1
DHCR24	hsa-let-7b-5p	1
DHCR24	hsa-miR-17-5p	1
DHCR24	hsa-miR-30a-3p	1
DHCR24	hsa-miR-29b-3p	1
DHCR24	hsa-miR-31-5p	1
DHCR24	hsa-miR-96-5p	1
CKAP2	hsa-miR-20a-5p	1
CKAP2	hsa-miR-23a-3p	1
CKAP2	hsa-miR-28-5p	1
CKAP2	hsa-miR-106a-5p	1
CKAP2	hsa-miR-93-5p	1
CKAP2	hsa-miR-26a-5p	1
CKAP2	hsa-miR-17-5p	1
CKAP2	hsa-miR-26b-5p	1
PKP2	hsa-miR-23a-3p	1
OAS1	hsa-miR-22-3p	1
OAS1	hsa-miR-28-5p	1
OAS1	hsa-miR-31-5p	1
CENPK	hsa-miR-19b-3p	1
CENPK	hsa-miR-29a-3p	1
CENPK	hsa-miR-29b-3p	1
CENPK	hsa-miR-27a-3p	1
CENPK	hsa-miR-92a-3p	1
CENPK	hsa-miR-19a-3p	1
CENPK	hsa-miR-25-3p	1
SCNN1A	hsa-miR-31-5p	1
TYMS	hsa-miR-23a-3p	1
TYMS	hsa-miR-16-5p	1
TYMS	hsa-miR-29a-3p	1
TYMS	hsa-miR-15a-5p	1
TYMS	hsa-miR-29b-3p	1
PAICS	hsa-miR-20a-5p	1
PAICS	hsa-miR-19b-3p	1
PAICS	hsa-miR-93-5p	1
PAICS	hsa-let-7e-5p	1
PAICS	hsa-miR-19a-3p	1
PVRL1	hsa-miR-103a-3p	1
PVRL1	hsa-miR-107	1
PVRL1	hsa-miR-16-5p	1
PVRL1	hsa-miR-15a-5p	1
PVRL1	hsa-miR-29b-3p	1
PVRL1	hsa-miR-30a-5p	1
PVRL1	hsa-miR-96-5p	1
NUDT4P1	hsa-miR-22-3p	1
NUDT4P1	hsa-miR-93-5p	1
DIAPH3	hsa-miR-19b-3p	1
DIAPH3	hsa-miR-98-5p	1
DIAPH3	hsa-miR-26a-5p	1
DIAPH3	hsa-let-7b-5p	1
DIAPH3	hsa-let-7d-5p	1
DIAPH3	hsa-let-7f-5p	1
DIAPH3	hsa-let-7e-5p	1
[truncated: 15,337 more rows]
